# Supplementary material
Source: PubMed Central journal article supplement (PMC3297713)
Supplement: NIHMS359422-supplement-1_si_001.pdf [file NIHMS359422-supplement-1_si_001.pdf]

**Supporting Information for**

**Identification and Structure-Activity Relationships of a Novel Series of Estrogen Receptor  
Ligands Based on 7-Thiabicyclo[2.2.1]hept-2-ene-7-oxide**

Pengcheng Wang,<sup>a</sup> Jian Min,<sup>a</sup> Jerome C. Nwachukwu,<sup>c</sup> Valerie Cavett,<sup>c</sup> Kathryn E. Carlson,<sup>b</sup> Pu  
Guo,<sup>a</sup> Manghong Zhu,<sup>a</sup> Yangfan Zheng,<sup>a</sup> Chune Dong,<sup>a</sup> John A. Katzenellenbogen,<sup>b\*</sup> Kendall W.  
Nettles,<sup>c</sup> Hai-Bing Zhou<sup>a\*</sup>

**TABLE OF CONTENTS**

|                                                          |           |
|----------------------------------------------------------|-----------|
| <b>PART I. SUMMARY OF HPLC RESULTS .....</b>             | <b>S2</b> |
| <b>PART II. HPLC and SPECTRA OF COMPOUNDS 10-14.....</b> | <b>S3</b> |

## Part 1. Summary of HPLC results

| Cmpd       | Normal Phase    | Ret. Time | %Purity  | Reverse Phase                             | Ret. Time | %Purity  |
|------------|-----------------|-----------|----------|-------------------------------------------|-----------|----------|
| <b>10a</b> | 50:50 EtOAc:Hex | 4.763     | 97.8233  | 70:30 CH <sub>3</sub> CN:H <sub>2</sub> O | 3.425     | 99.0600  |
| <b>10b</b> | 50:50 EtOAc:Hex | 5.377     | 97.2888  | 70:30 CH <sub>3</sub> CN:H <sub>2</sub> O | 4.298     | 100.0000 |
| <b>10c</b> | 50:50 EtOAc:Hex | 4.733     | 96.3716  | 70:30 CH <sub>3</sub> CN:H <sub>2</sub> O | 5.082     | 98.3858  |
| <b>10d</b> | 50:50 EtOAc:Hex | 3.153     | 97.2462  | 70:30 CH <sub>3</sub> CN:H <sub>2</sub> O | 2.912     | 100.0000 |
| <b>10e</b> | 50:50 EtOAc:Hex | 6.220     | 95.4558  | 60:40 CH <sub>3</sub> CN:H <sub>2</sub> O | 3.538     | 97.9138  |
| <b>11a</b> | 50:50 EtOAc:Hex | 5.842     | 96.3689  | 65:35 CH <sub>3</sub> CN:H <sub>2</sub> O | 3.172     | 95.2213  |
| <b>11b</b> | 50:50 EtOAc:Hex | 7.012     | 96.9868  | 60:40 CH <sub>3</sub> CN:H <sub>2</sub> O | 4.298     | 100.0000 |
| <b>11c</b> | 50:50 EtOAc:Hex | 3.670     | 96.1392  | 60:40 CH <sub>3</sub> CN:H <sub>2</sub> O | 3.055     | 96.4430  |
| <b>11d</b> | 50:50 EtOAc:Hex | 5.700     | 96.1551  | 60:40 CH <sub>3</sub> CN:H <sub>2</sub> O | 3.743     | 99.1352  |
| <b>11e</b> | 55:45 EtOAc:Hex | 5.090     | 97.1570  | 60:40 CH <sub>3</sub> CN:H <sub>2</sub> O | 3.697     | 96.4690  |
| <b>11f</b> | 50:50 EtOAc:Hex | 5.767     | 97.5783  | 60:40 CH <sub>3</sub> CN:H <sub>2</sub> O | 3.863     | 97.6714  |
| <b>11g</b> | 50:50 EtOAc:Hex | 5.395     | 99.0275  | 70:30 CH <sub>3</sub> CN:H <sub>2</sub> O | 4.377     | 100.0000 |
| <b>11h</b> | 50:50 EtOAc:Hex | 5.912     | 97.6497  | 60:40 CH <sub>3</sub> CN:H <sub>2</sub> O | 3.133     | 99.3376  |
| <b>11i</b> | 60:40 EtOAc:Hex | 5.090     | 95.1145  | 70:30 CH <sub>3</sub> CN:H <sub>2</sub> O | 3.400     | 100.0000 |
| <b>11j</b> | 60:40 EtOAc:Hex | 7.700     | 97.0893  | 60:40 CH <sub>3</sub> CN:H <sub>2</sub> O | 3.838     | 98.2647  |
| <b>11k</b> | 50:50 EtOAc:Hex | 7.012     | 97.7604  | 65:35 CH <sub>3</sub> CN:H <sub>2</sub> O | 3.055     | 96.5202  |
| <b>11l</b> | 50:50 EtOAc:Hex | 3.613     | 100.0000 | 70:30 CH <sub>3</sub> CN:H <sub>2</sub> O | 4.102     | 98.9936  |
| <b>12a</b> | 50:50 EtOAc:Hex | 4.898     | 97.4603  | 70:30 CH <sub>3</sub> CN:H <sub>2</sub> O | 4.220     | 96.0623  |
| <b>12b</b> | 40:60 EtOAc:Hex | 4.927     | 98.1406  | 70:30 CH <sub>3</sub> CN:H <sub>2</sub> O | 4.398     | 99.5508  |
| <b>12c</b> | 50:50 EtOAc:Hex | 6.262     | 96.6904  | 65:35 CH <sub>3</sub> CN:H <sub>2</sub> O | 3.270     | 98.2904  |
| <b>12d</b> | 50:50 EtOAc:Hex | 5.837     | 98.7216  | 70:30 CH <sub>3</sub> CN:H <sub>2</sub> O | 4.515     | 98.6482  |
| <b>12e</b> | 50:50 EtOAc:Hex | 7.080     | 98.2181  | 70:30 CH <sub>3</sub> CN:H <sub>2</sub> O | 4.352     | 98.7656  |
| <b>12f</b> | 50:50 EtOAc:Hex | 4.972     | 99.4138  | 70:30 CH <sub>3</sub> CN:H <sub>2</sub> O | 4.932     | 98.6335  |
| <b>12g</b> | 50:50 EtOAc:Hex | 6.187     | 96.7846  | 60:40 CH <sub>3</sub> CN:H <sub>2</sub> O | 3.672     | 99.2117  |
| <b>12h</b> | 50:50 EtOAc:Hex | 3.748     | 96.8128  | 70:30 CH <sub>3</sub> CN:H <sub>2</sub> O | 3.683     | 96.8229  |
| <b>12i</b> | 50:50 EtOAc:Hex | 5.140     | 100.0000 | 60:40 CH <sub>3</sub> CN:H <sub>2</sub> O | 3.677     | 98.7842  |
| <b>13</b>  | 50:50 EtOAc:Hex | 3.763     | 100.0000 | 60:40 CH <sub>3</sub> CN:H <sub>2</sub> O | 3.402     | 99.4081  |
| <b>14</b>  | 50:50 EtOAc:Hex | 4.112     | 98.1149  | 60:40 CH <sub>3</sub> CN:H <sub>2</sub> O | 3.328     | 97.9905  |

**PART II. HPLC CHROMATOGRAMS**

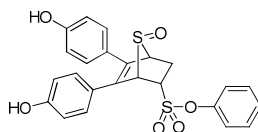

**10a**

Normal Phase (Method 50:50 EtOAc:Hex, Flow rate 1.0 mL/min)

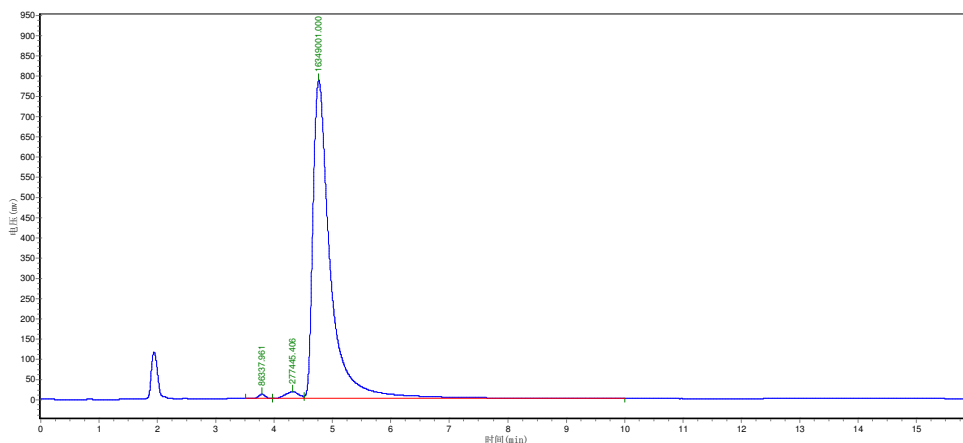

| Peak   | Ret. Time (min) | Height (mAu) | Area (Mau*s) | Area Percent (%) |
|--------|-----------------|--------------|--------------|------------------|
| 1      | 3.790           | 10583.900    | 86337.961    | 0.5166           |
| 2      | 4.317           | 17393.021    | 277445.406   | 1.6601           |
| 3      | 4.763           | 787540.313   | 16349001.000 | 97.8233          |
| Totals |                 | 815517.234   | 16712784.367 | 100.0000         |

Reverse Phase (Method 70:30 CH<sub>3</sub>CN:H<sub>2</sub>O, Flow rate 0.7mL/min)

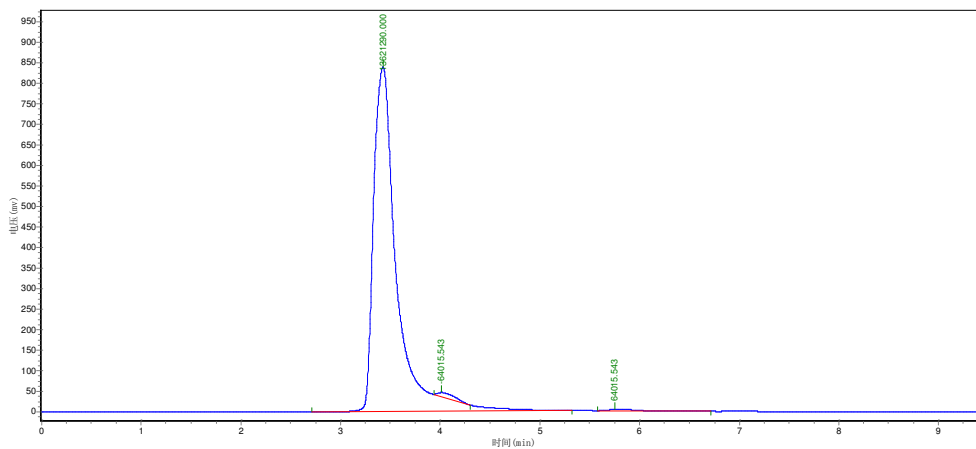

| Peak   | Ret. Time (min) | Height(mAu) | Area (Mau *s) | Area Percent (%) |
|--------|-----------------|-------------|---------------|------------------|
| 1      | 3.425           | 838745.875  | 13621290.000  | 99.0600          |
| 2      | 4.015           | 9809.156    | 64015.543     | 0.4700           |
| 3      | 5.753           | 2986.313    | 64015.543     | 0.4700           |
| Totals |                 | 851541.344  | 13749321.086  | 100.0000         |

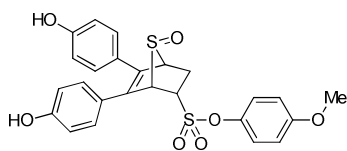

**10b**

Normal Phase (Method 50:50 EtOAc:Hex, Flow rate 0.7mL/min)

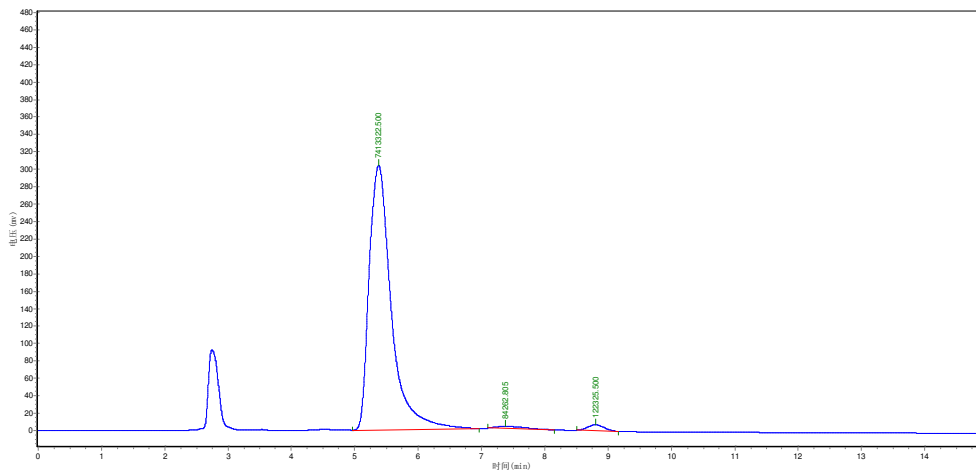

| Peak   | Ret. Time (min) | Height (mAu) | Area (Mau*s) | Area Percent (%) |
|--------|-----------------|--------------|--------------|------------------|
| 1      | 5.377           | 304018.844   | 7413322.500  | 97.2888          |
| 2      | 7.380           | 2629.073     | 84262.805    | 1.1058           |
| 3      | 8.802           | 6727.541     | 122325.500   | 1.6053           |
| Totals |                 | 312915.458   | 7619910.805  | 100.0000         |

Reverse Phase (Method 70:30 CH<sub>3</sub>CN:H<sub>2</sub>O, Flow rate 0.7mL/min)

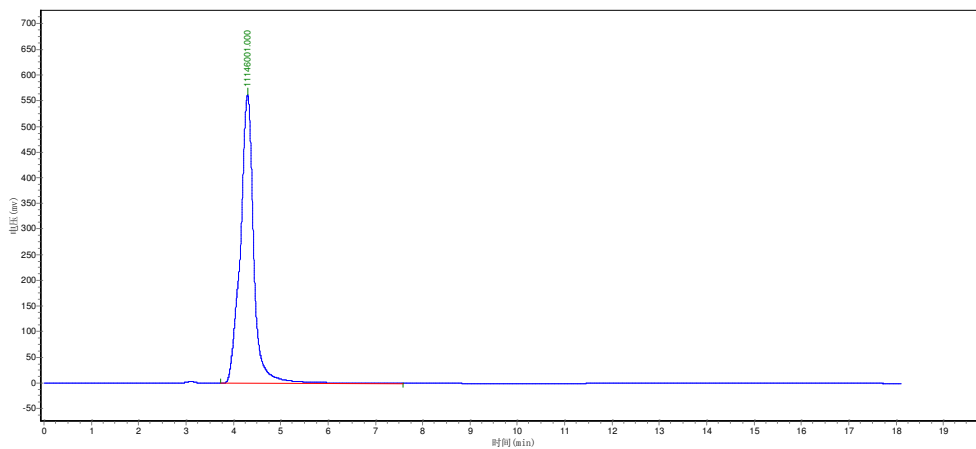

| Peak   | Ret. Time (min) | Height (mAu) | Area (Mau*s) | Area Percent (%) |
|--------|-----------------|--------------|--------------|------------------|
| 1      | 4.298           | 562206.375   | 11146001.000 | 100.0000         |
| Totals |                 | 562206.375   | 11146001.000 | 100.0000         |

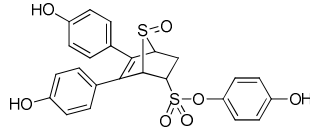

**10c**

Normal Phase (Method 50:50 EtOAc:Hex, Flow rate 1.0 mL/min)

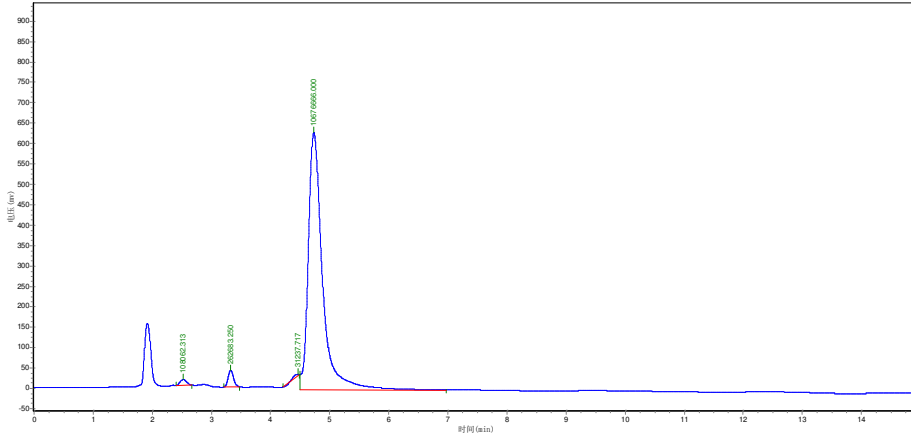

| Peak   | Ret. Time (min) | Height (mAu) | Area (Mau*s) | Area Percent (%) |
|--------|-----------------|--------------|--------------|------------------|
| 1      | 2.527           | 14046.031    | 108062.313   | 0.9754           |
| 2      | 3.327           | 40709.262    | 262683.250   | 2.3711           |
| 3      | 4.462           | 4075.249     | 31237.717    | 0.2820           |
| 4      | 4.733           | 630389.063   | 10676666.000 | 96.3716          |
| Totals |                 | 689219.605   | 11078649.280 | 100.0000         |

Reverse Phase (Method 70:30 CH<sub>3</sub>CN:H<sub>2</sub>O, Flow rate 0.7 mL/min)

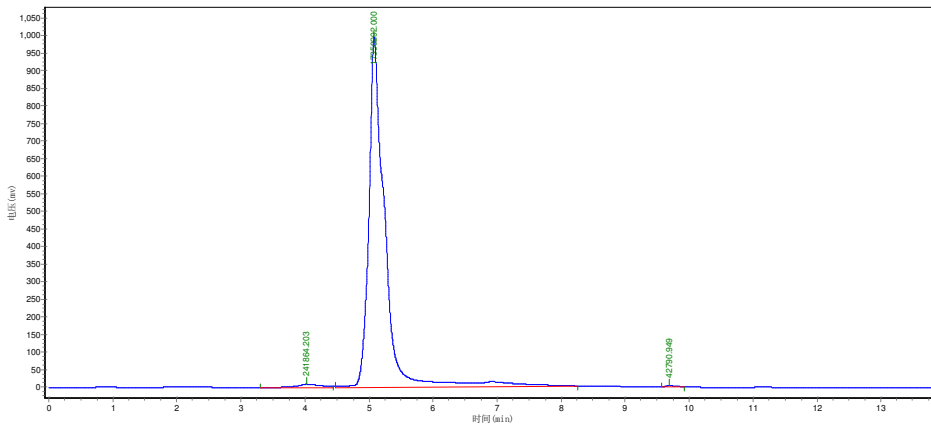

| Peak   | Ret. Time (min) | Height (mAu) | Area (Mau*s) | Area Percent (%) |
|--------|-----------------|--------------|--------------|------------------|
| 1      | 4.025           | 9228.323     | 241864.203   | 1.3715           |
| 2      | 5.082           | 994293.188   | 17350292.000 | 98.3858          |
| 3      | 9.693           | 4641.698     | 42790.949    | 0.2426           |
| Totals |                 | 1008163.208  | 17634947.152 | 100.0000         |

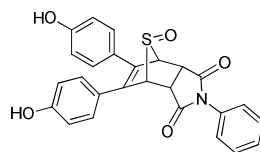

**10d**

Normal Phase (Method 50:50 EtOAc:Hex, Flow rate 1.0mL/min)

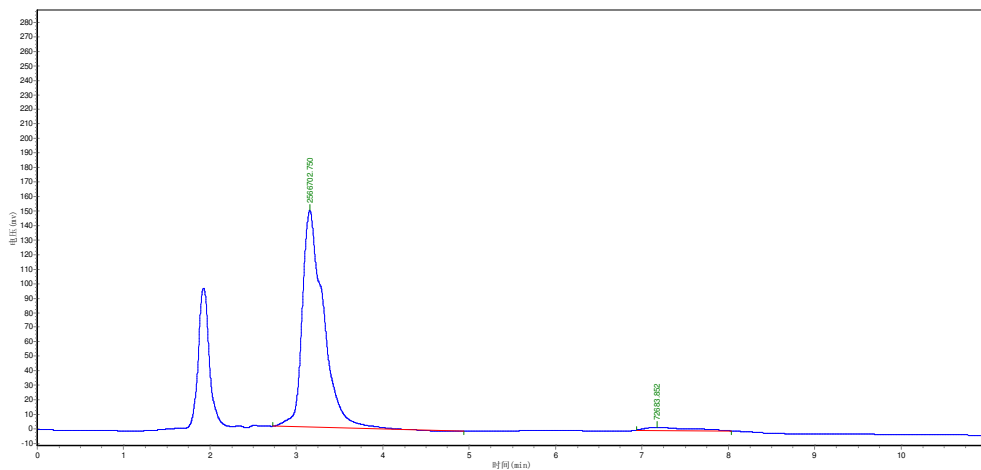

| Peak   | Ret. Time (min) | Height (mAu) | Area (Mau*s) | Area Percent (%) |
|--------|-----------------|--------------|--------------|------------------|
| 1      | 3.153           | 149212.703   | 2566702.750  | 97.2462          |
| 2      | 7.177           | 2111.507     | 72683.852    | 2.7538           |
| Totals |                 | 151324.210   | 2639386.602  | 100.0000         |

Reverse Phase (Method 70:30 CH<sub>3</sub>CN:H<sub>2</sub>O, Flow rate 0.7mL/min)

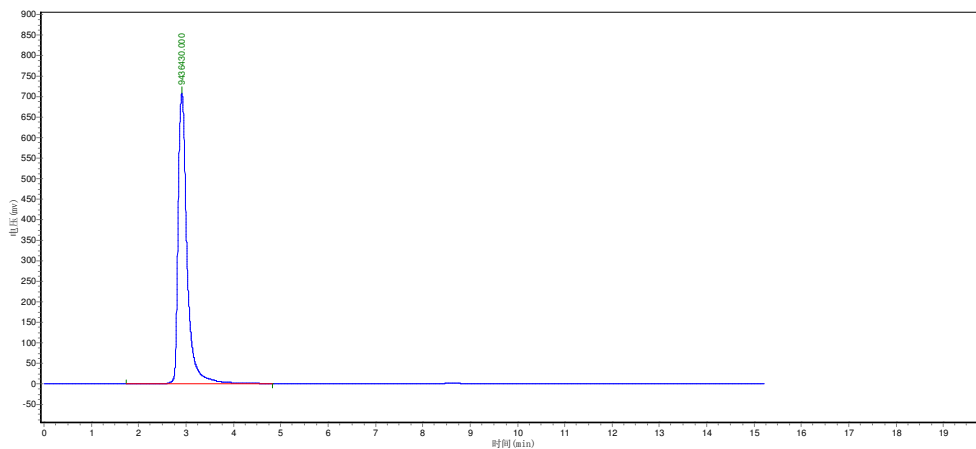

| Peak   | Ret. Time (min) | Height (mAu) | Area (Mau*s) | Area Percent (%) |
|--------|-----------------|--------------|--------------|------------------|
| 1      | 2.912           | 707755.375   | 9436430.000  | 100.0000         |
| Totals |                 | 707755.375   | 9436430.000  | 100.0000         |

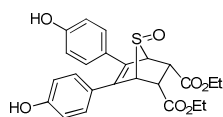

**10e**

Normal Phase (Method 50:50 EtOAc:Hex, Flow rate 0.7mL/min)

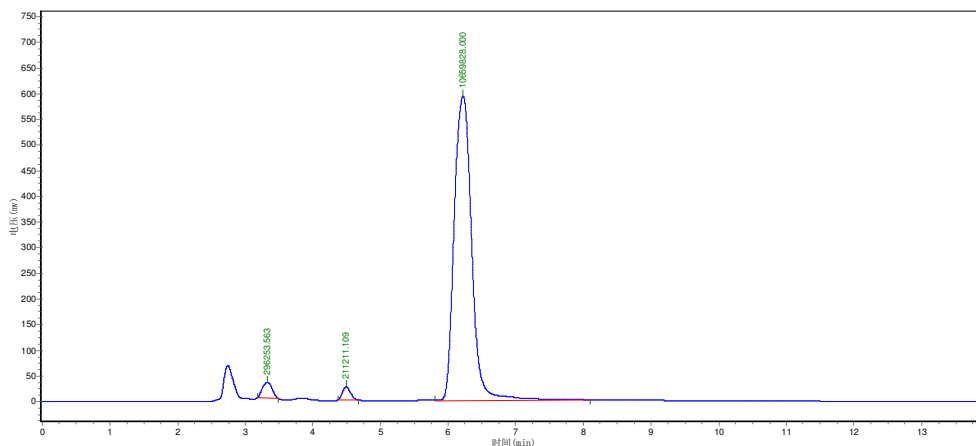

| Peak   | Ret. Time (min) | Height (mAu) | Area (Mau*s) | Area Percent (%) |
|--------|-----------------|--------------|--------------|------------------|
| 1      | 3.328           | 29694.607    | 296253.563   | 2.6529           |
| 2      | 4.492           | 25298.492    | 211211.109   | 1.8913           |
| 3      | 6.220           | 593967.563   | 10659828.000 | 95.4558          |
| Totals |                 | 648960.662   | 11167292.672 | 100.0000         |

Reverse Phase (Method 60:40 CH<sub>3</sub>CN:H<sub>2</sub>O, Flow rate 1.0mL/min)

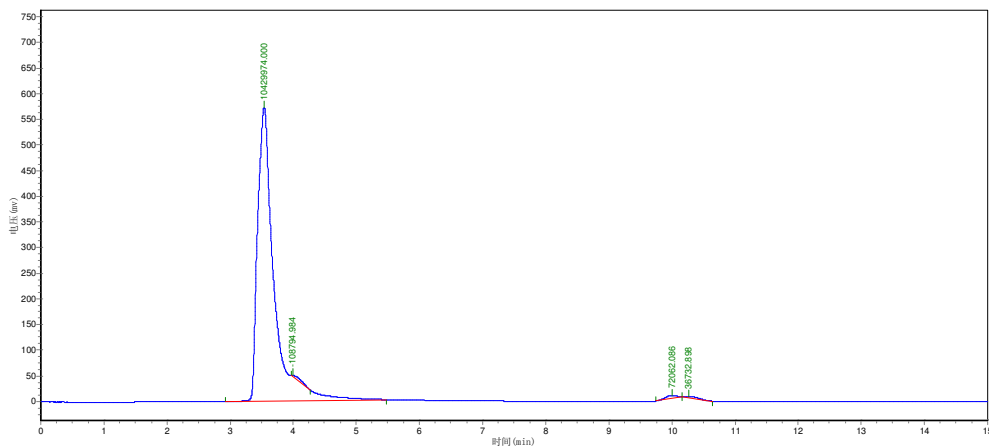

| Peak   | Ret. Time (min) | Height (mAu) | Area (Mau*s) | Area Percent (%) |
|--------|-----------------|--------------|--------------|------------------|
| 1      | 3.538           | 573014.063   | 10429974.000 | 97.9138          |
| 2      | 4.000           | 2668.095     | 108794.984   | 1.0431           |
| 3      | 10.005          | 5640.492     | 72062.086    | 0.6909           |
| 4      | 10.268          | 2597.481     | 36732.898    | 0.3522           |
| Totals |                 | 583920.130   | 10647563.968 | 100.0000         |

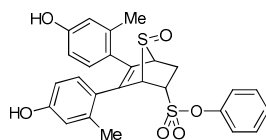

**11a**

Normal Phase (Method 50:50 EtOAc:Hex, Flow rate 0.7mL/min)

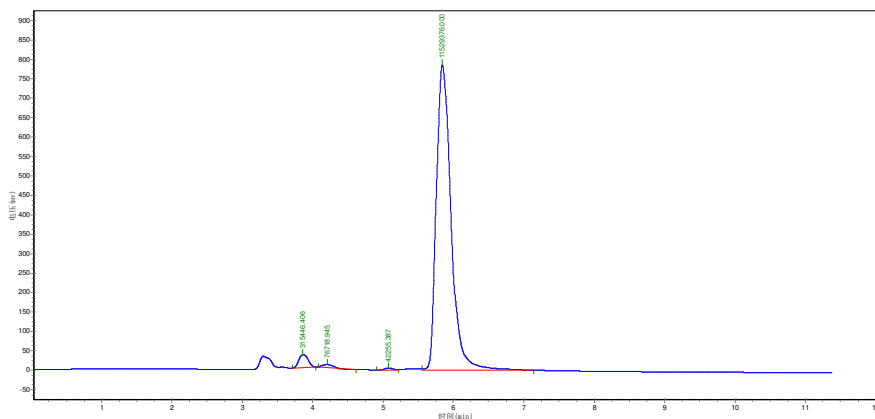

| Peak   | Ret. Time (min) | Height (mAu) | Area (Mau*s) | Area Percent (%) |
|--------|-----------------|--------------|--------------|------------------|
| 1      | 3.863           | 34158.789    | 315446.406   | 2.6367           |
| 2      | 4.207           | 8517.787     | 76718.945    | 0.6413           |
| 3      | 5.075           | 4636.987     | 42255.387    | 0.3532           |
| 4      | 5.842           | 785950.000   | 11529376.000 | 96.3689          |
| Totals |                 | 833263.563   | 11963796.738 | 100.0000         |

Reverse Phase (Method 65:35 CH<sub>3</sub>CN:H<sub>2</sub>O, Flow rate 1.0mL/min)

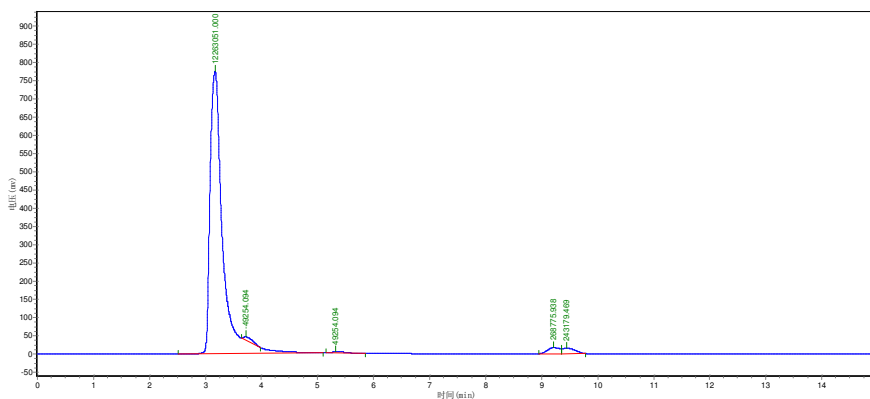

| Peak   | Ret. Time (min) | Height (mAu) | Area (Mau*s) | Area Percent (%) |
|--------|-----------------|--------------|--------------|------------------|
| 1      | 3.172           | 776359.625   | 12263051.000 | 95.2213          |
| 2      | 3.715           | 9322.489     | 49254.094    | 0.3856           |
| 3      | 5.322           | 2810.720     | 49254.094    | 0.3856           |
| 4      | 9.213           | 17497.393    | 268775.938   | 2.1039           |
| 5      | 9.450           | 15377.485    | 243179.469   | 1.9036           |
| Totals |                 | 821367.712   | 12873514.594 | 100.0000         |



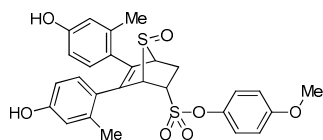

**11b**

Normal Phase (Method 50:50 EtOAc:Hex, Flow rate 0.7mL/min)

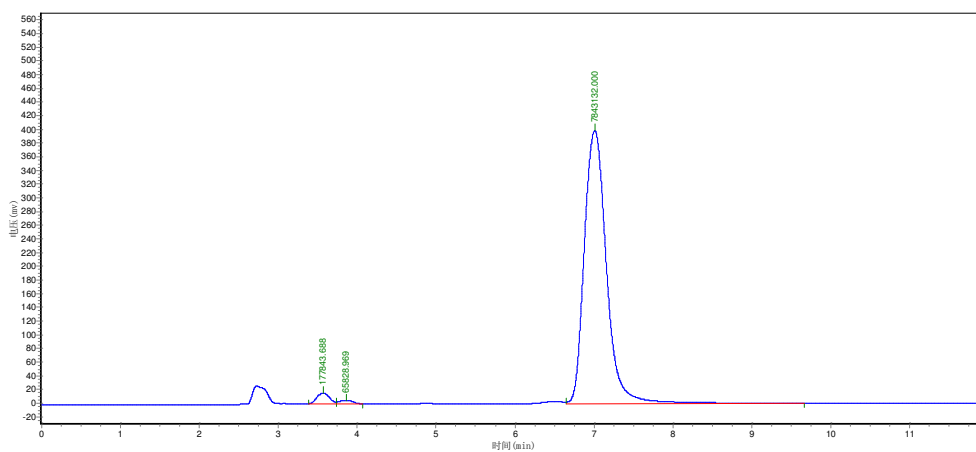

| Peak   | Ret. Time (min) | Height (mAu) | Area (Mau*s) | Area Percent (%) |
|--------|-----------------|--------------|--------------|------------------|
| 1      | 3.572           | 15734.467    | 177843.688   | 2.1992           |
| 2      | 3.862           | 5132.794     | 65828.969    | 0.8140           |
| 3      | 7.012           | 399461.625   | 7843132.000  | 96.9868          |
| Totals |                 | 420328.886   | 8086804.656  | 100.0000         |

Reverse Phase (Method 60:40 CH<sub>3</sub>CN:H<sub>2</sub>O, Flow rate 0.7mL/min)

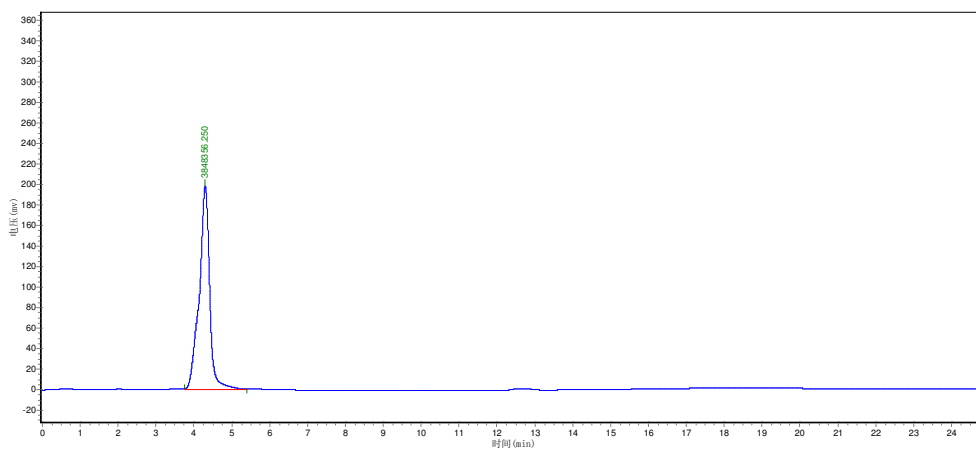

| Peak   | Ret. Time (min) | Height (mAu) | Area (Mau*s) | Area Percent (%) |
|--------|-----------------|--------------|--------------|------------------|
| 1      | 4.298           | 198462.484   | 3848356.250  | 100.0000         |
| Totals |                 | 198462.484   | 3848356.250  | 100.0000         |

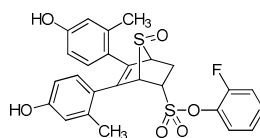

**11c**

Normal Phase (Method 50:50 EtOAc:Hex, Flow rate 1.0 mL/min)

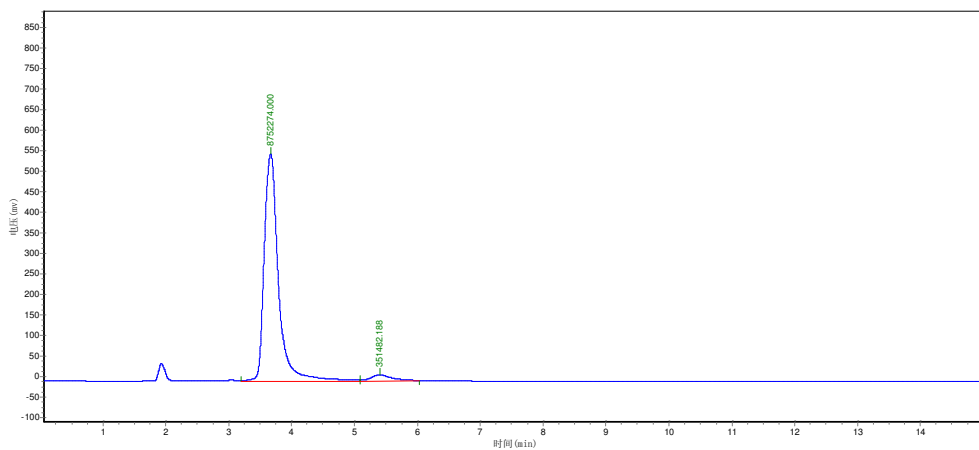

| Peak   | Ret. Time (min) | Height (mAu) | Area (Mau *s) | Area Percent (%) |
|--------|-----------------|--------------|---------------|------------------|
| 1      | 3.670           | 554015.125   | 8752274.000   | 96.1392          |
| 2      | 5.402           | 15181.188    | 351482.188    | 3.8608           |
| Totals |                 | 569196.313   | 9103756.188   | 100.0000         |

Reverse Phase (Method 60:40 CH<sub>3</sub>CN:H<sub>2</sub>O, Flow rate 1.0mL/min)

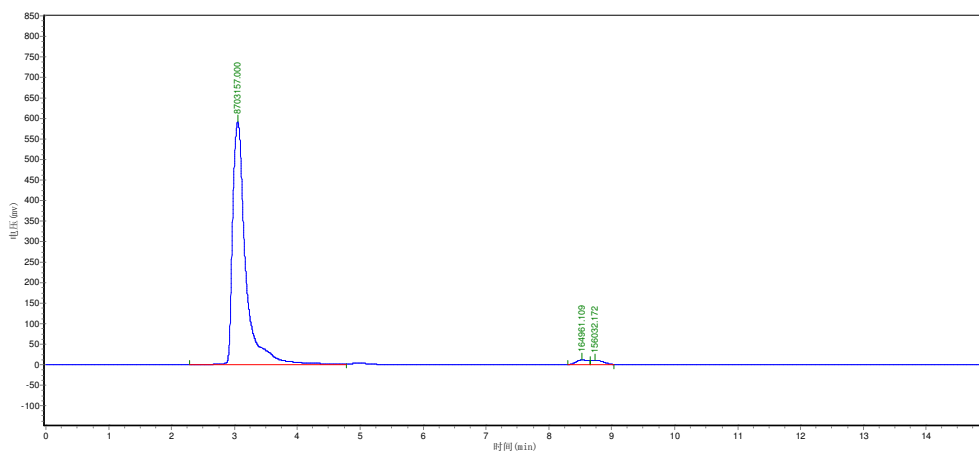

| Peak   | Ret. Time (min) | Height (mAu) | Area (Mau*s) | Area Percent (%) |
|--------|-----------------|--------------|--------------|------------------|
| 1      | 3.055           | 591818.125   | 8703157.000  | 96.4430          |
| 2      | 8.530           | 11778.706    | 164961.109   | 1.8280           |
| 3      | 8.738           | 10944.895    | 156032.172   | 1.7291           |
| Totals |                 | 614541.726   | 9024150.281  | 100.0000         |

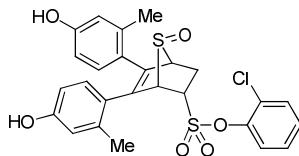

**11d**

Normal Phase (Method 50:50 EtOAc:Hex, Flow rate 0.7mL/min)

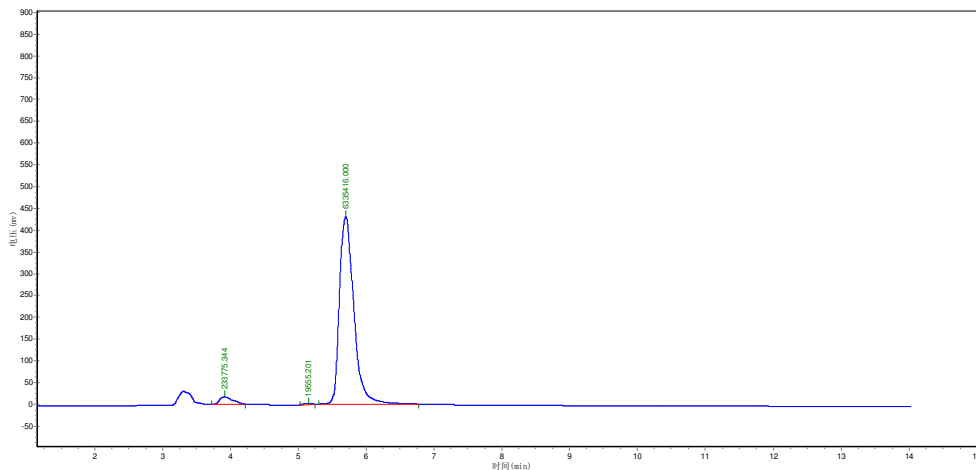

| Peak   | Ret. Time (min) | Height (mAu) | Area (Mau*s) | Area Percent (%) |
|--------|-----------------|--------------|--------------|------------------|
| 1      | 3.913           | 17497.559    | 233775.344   | 3.5481           |
| 2      | 5.152           | 2668.775     | 19555.201    | 0.2968           |
| 3      | 5.700           | 430385.375   | 6335416.000  | 96.1551          |
| Totals |                 | 450551.709   | 6588746.545  | 100.0000         |

Reverse Phase (Method 60:40 CH<sub>3</sub>CN:H<sub>2</sub>O, Flow rate 1.0mL/min)

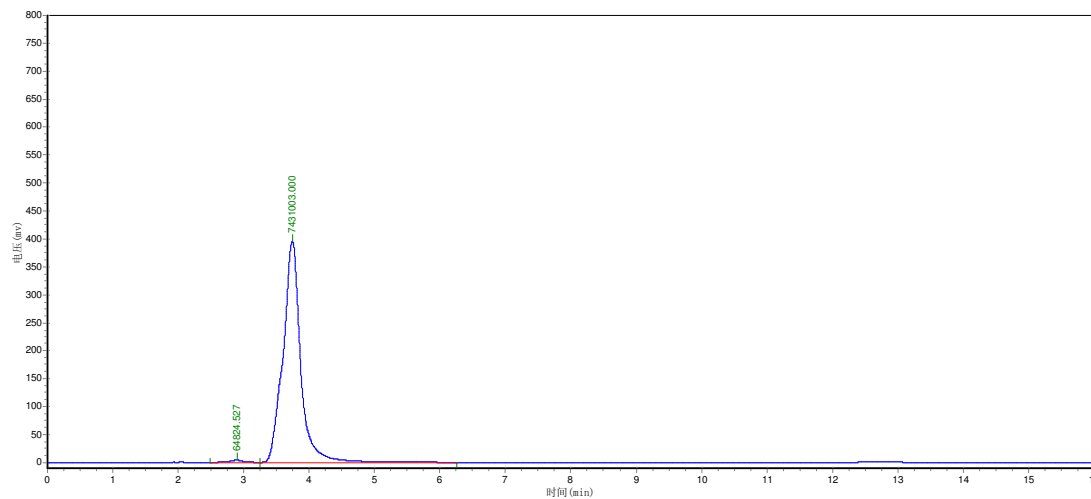

| Peak   | Ret. Time (min) | Height (mAu) | Area (Mau*s) | Area Percent (%) |
|--------|-----------------|--------------|--------------|------------------|
| 1      | 2.897           | 4179.611     | 64824.527    | 0.8648           |
| 2      | 3.743           | 395186.625   | 7431003.000  | 99.1352          |
| Totals |                 | 399366.236   | 7495827.527  | 100.0000         |

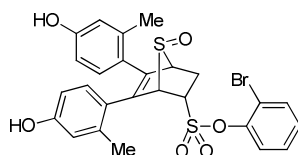

**11e**

Normal Phase (Method 55:45 EtOAc:Hex, Flow rate 1.0mL/min)

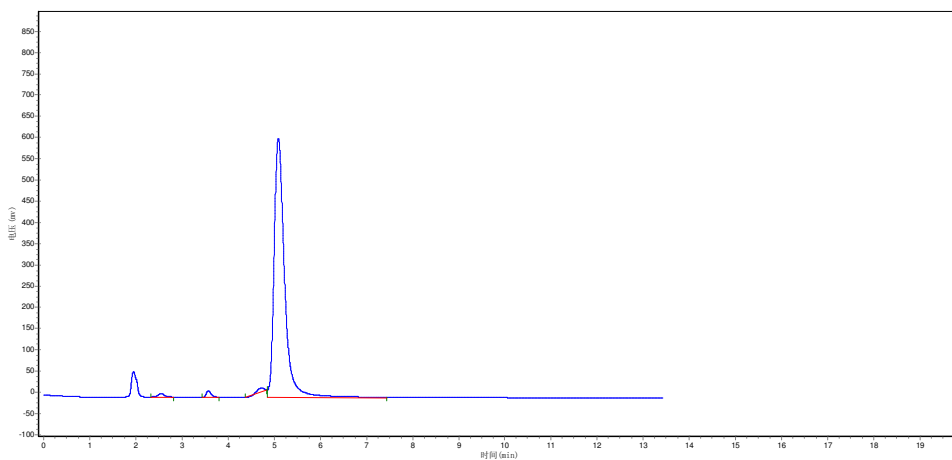

| Peak   | Ret. Time (min) | Height (mAu) | Area (Mau*s) | Area Percent (%) |
|--------|-----------------|--------------|--------------|------------------|
| 1      | 2.547           | 8740.408     | 85644.305    | 0.8642           |
| 2      | 3.575           | 15680.849    | 115524.320   | 1.1657           |
| 3      | 4.725           | 8794.325     | 80579.898    | 0.8131           |
| 4      | 5.090           | 609059.375   | 9628617.000  | 97.1570          |
| Totals |                 | 642274.957   | 9910365.523  | 100.0000         |

Reverse Phase (Method 60:40 CH<sub>3</sub>CN:H<sub>2</sub>O, Flow rate 1.0mL/min)

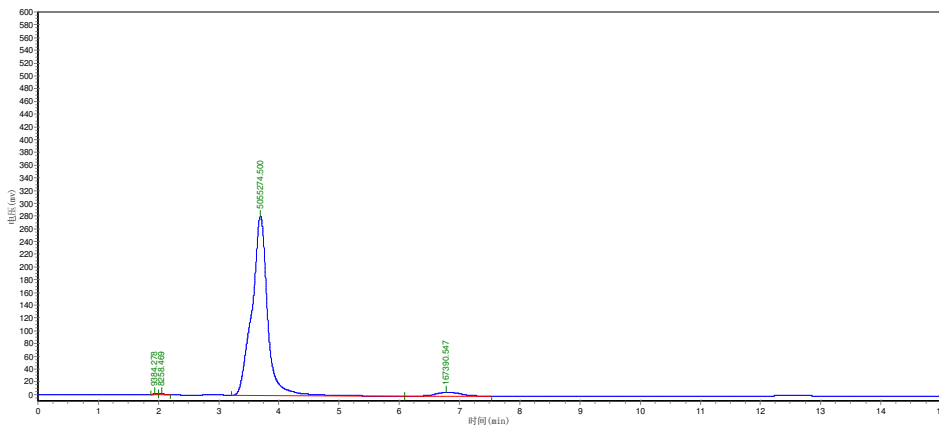

| Peak   | Ret. Time (min) | Height (mAu) | Area (Mau*s) | Area Percent (%) |
|--------|-----------------|--------------|--------------|------------------|
| 1      | 1.943           | 1769.980     | 9384.278     | 0.1791           |
| 2      | 2.053           | 1431.911     | 8258.469     | 0.1576           |
| 3      | 3.697           | 280972.094   | 5055274.500  | 96.4690          |
| 4      | 6.777           | 5768.661     | 167390.547   | 3.1943           |
| Totals |                 | 289942.646   | 5240307.794  | 100.0000         |

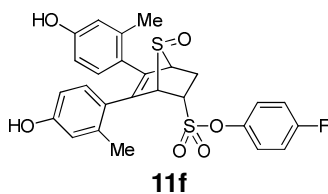

Normal Phase (Method 50:50 EtOAc:Hex, Flow rate 0.7mL/min)

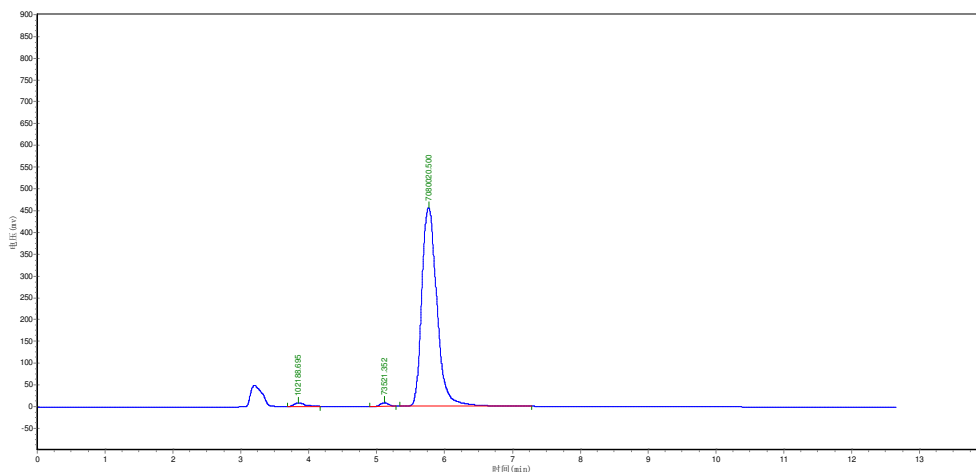

| Peak   | Ret. Time (min) | Height (mAu) | Area (Mau*s) | Area Percent (%) |
|--------|-----------------|--------------|--------------|------------------|
| 1      | 3.850           | 8503.345     | 102188.695   | 1.4084           |
| 2      | 5.117           | 8744.025     | 73521.352    | 1.0133           |
| 3      | 5.767           | 455840.344   | 7080020.500  | 97.5783          |
| Totals |                 | 473087.714   | 7255730.547  | 100.0000         |

Reverse Phase (Method 60:40 CH<sub>3</sub>CN:H<sub>2</sub>O, Flow rate 1.0mL/min)

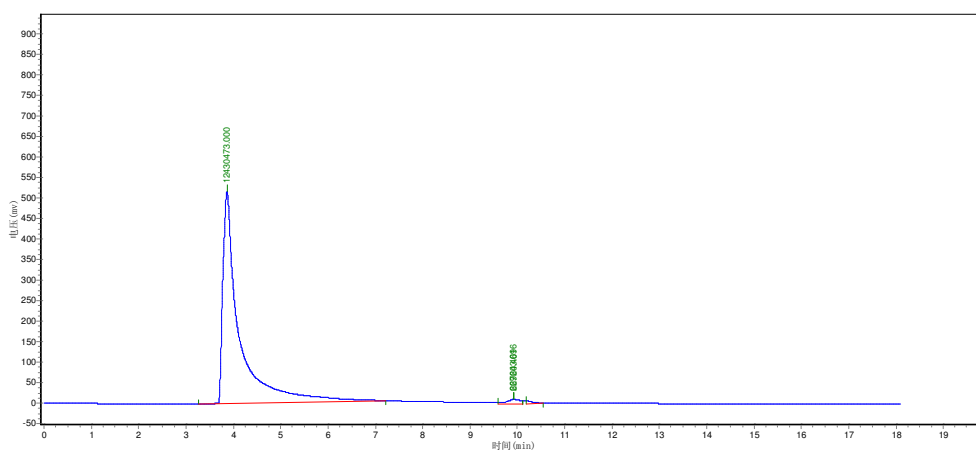

| Peak   | Ret. Time (min) | Height (mAu) | Area (Mau*s) | Area Percent (%) |
|--------|-----------------|--------------|--------------|------------------|
| 1      | 3.863           | 515951.469   | 12430473.000 | 97.6714          |
| 2      | 9.928           | 11352.054    | 229643.016   | 1.8044           |
| 3      | 9.928           | 9671.539     | 66720.469    | 0.5243           |
| Totals |                 | 536975.062   | 12726836.484 | 100.0000         |

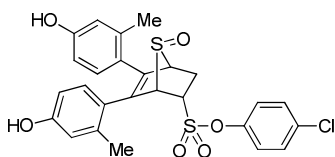

**11g**

Normal Phase (Method 50:50 EtOAc:Hex, Flow rate 0.7mL/min)

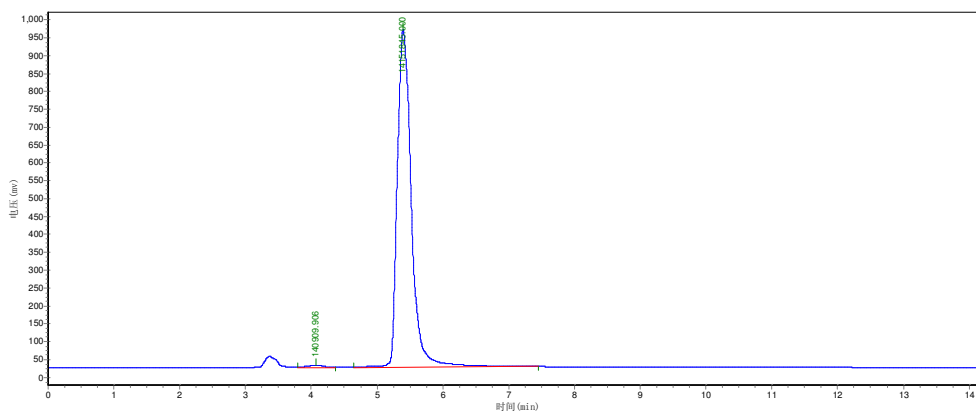

| Peak   | Ret. Time (min) | Height (mAu) | Area (Mau*s) | Area Percent (%) |
|--------|-----------------|--------------|--------------|------------------|
| 1      | 4.067           | 6637.253     | 140909.906   | 0.9725           |
| 2      | 5.395           | 946908.500   | 14348390.000 | 99.0275          |
| Totals |                 | 953545.753   | 14489299.906 | 100.0000         |

Reverse Phase (Method 70:30 CH<sub>3</sub>CN:H<sub>2</sub>O, Flow rate 0.7mL/min)

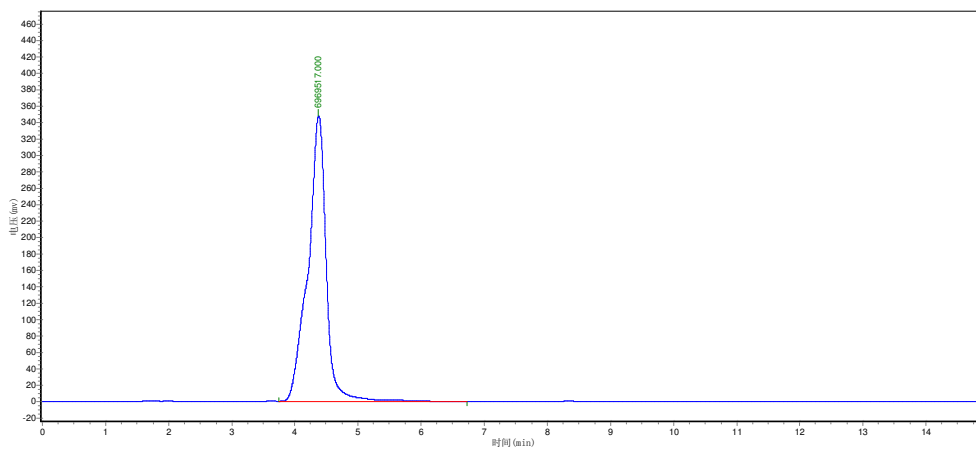

| Peak   | Ret. Time (min) | Height (mAu) | Area (Mau*s) | Area Percent (%) |
|--------|-----------------|--------------|--------------|------------------|
| 1      | 4.377           | 347950.750   | 6969517.000  | 100.0000         |
| Totals |                 | 347950.750   | 6969517.000  | 100.0000         |

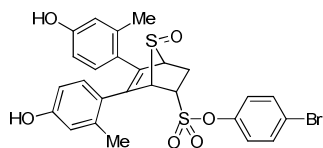

**11h**

Normal Phase (Method 50:50 EtOAc:Hex, Flow rate 0.7 mL/min)

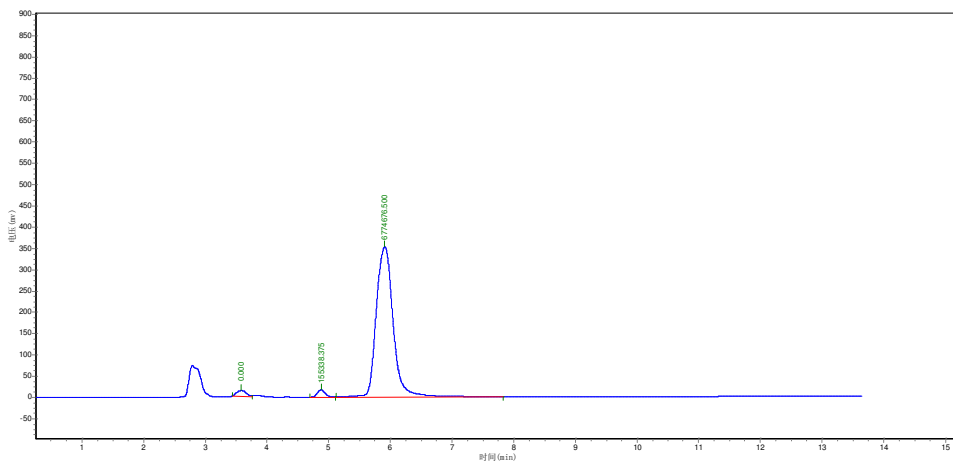

| Peak   | Ret. Time (min) | Height (mAu) | Area (Mau*s) | Area Percent (%) |
|--------|-----------------|--------------|--------------|------------------|
| 1      | 3.587           | 13225.173    | 3772.897     | 0.0544           |
| 2      | 3.833           | 915.414      | 3772.897     | 0.0544           |
| 3      | 4.878           | 17200.463    | 155338.375   | 2.2415           |
| 4      | 5.912           | 353087.750   | 6774676.500  | 97.6497          |
| Totals |                 | 384428.800   | 6937560.669  | 100.0000         |

Reverse Phase (Method 60:40 CH<sub>3</sub>CN:H<sub>2</sub>O, Flow rate 1.0 mL/min)

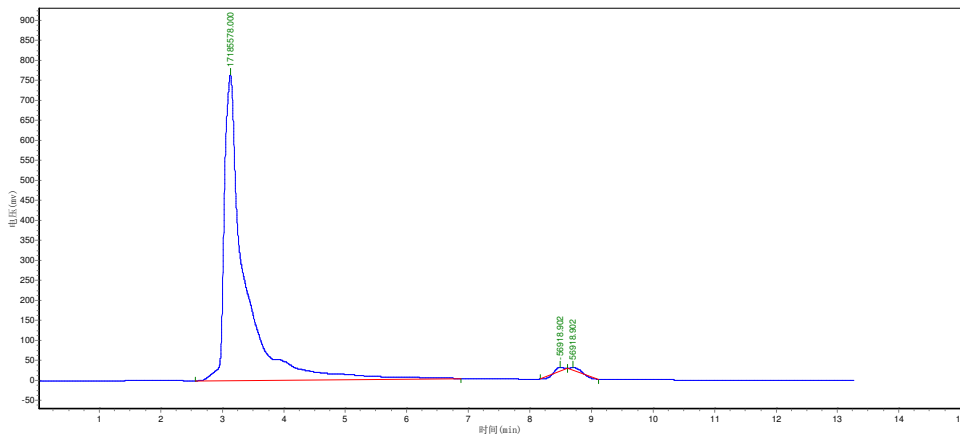

| Peak   | Ret. Time (min) | Height (mAu) | Area (Mau*s) | Area Percent (%) |
|--------|-----------------|--------------|--------------|------------------|
| 1      | 3.133           | 764344.813   | 17185578.000 | 99.3376          |
| 2      | 8.498           | 10527.901    | 56918.902    | 0.3312           |
| 3      | 8.705           | 7292.046     | 56918.902    | 0.3312           |
| Totals |                 | 782164.760   | 17299415.804 | 100.0000         |

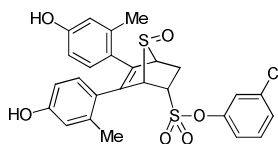

**11i**

Normal Phase (Method 60:40 EtOAc:Hex, Flow rate 1.0mL/min)

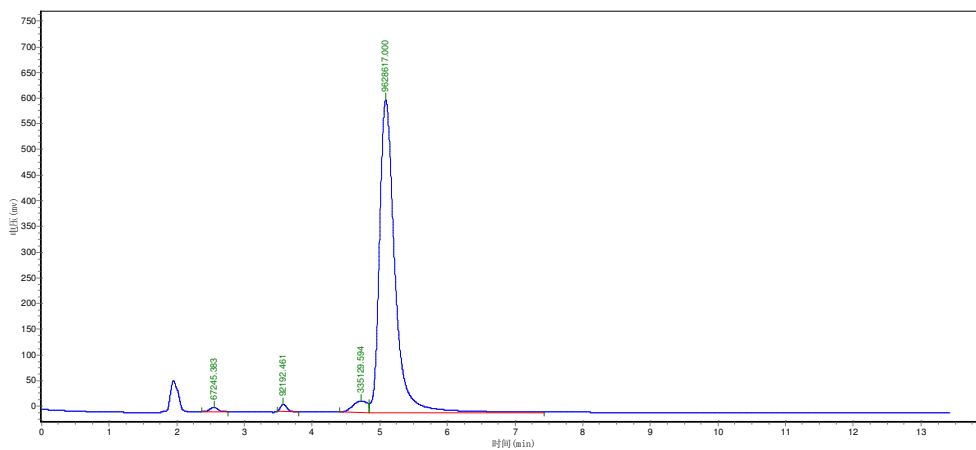

| Peak   | Ret. Time (min) | Height (mAu) | Area (Mau*s) | Area Percent (%) |
|--------|-----------------|--------------|--------------|------------------|
| 1      | 2.547           | 8046.525     | 67245.383    | 0.6643           |
| 2      | 3.575           | 14099.784    | 92192.461    | 0.9107           |
| 3      | 4.725           | 22076.152    | 335129.594   | 3.3105           |
| 4      | 5.090           | 609059.375   | 9628617.000  | 95.1145          |
| Totals |                 | 653281.836   | 10123184.438 | 100.0000         |

Reverse Phase (Method 70:30 CH<sub>3</sub>CN:H<sub>2</sub>O, Flow rate 0.7mL/min)

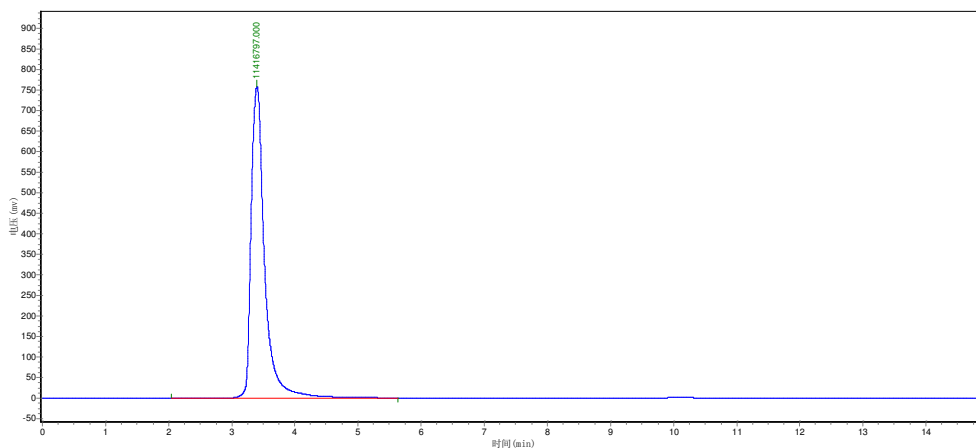

| Peak   | Ret. Time (min) | Height (mAu) | Area (Mau*s) | Area Percent (%) |
|--------|-----------------|--------------|--------------|------------------|
| 1      | 3.400           | 759487.313   | 11416797.000 | 100.0000         |
| Totals |                 | 759487.313   | 11416797.000 | 100.0000         |



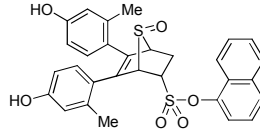

**11j**

Normal Phase (Method 60:40 EtOAc:Hex, Flow rate 1.0mL/min)

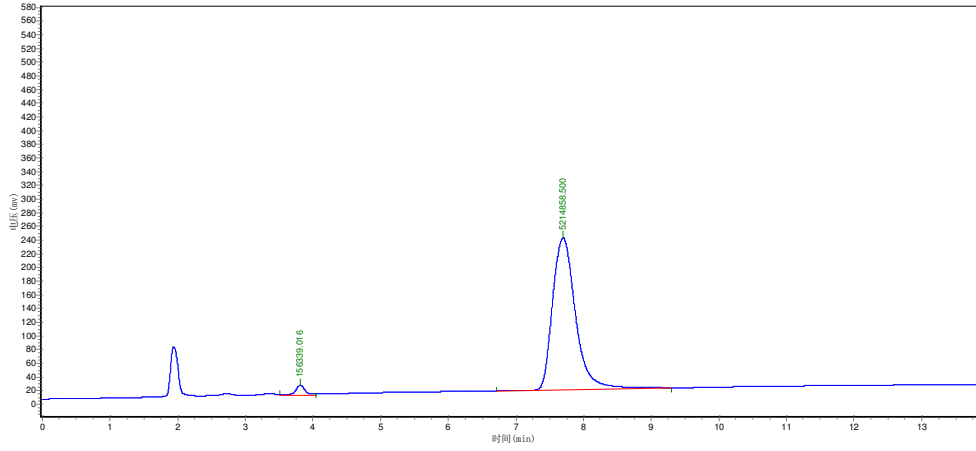

| Peak   | Ret. Time (min) | Height (mAu) | Area (Mau*s) | Area Percent (%) |
|--------|-----------------|--------------|--------------|------------------|
| 1      | 3.813           | 14316.037    | 156339.016   | 2.9107           |
| 2      | 7.700           | 221563.219   | 5214858.500  | 97.0893          |
| Totals |                 | 235879.256   | 5371197.516  | 100.0000         |

Reverse Phase (Method 60:40 CH<sub>3</sub>CN:H<sub>2</sub>O, Flow rate 1.0mL/min)

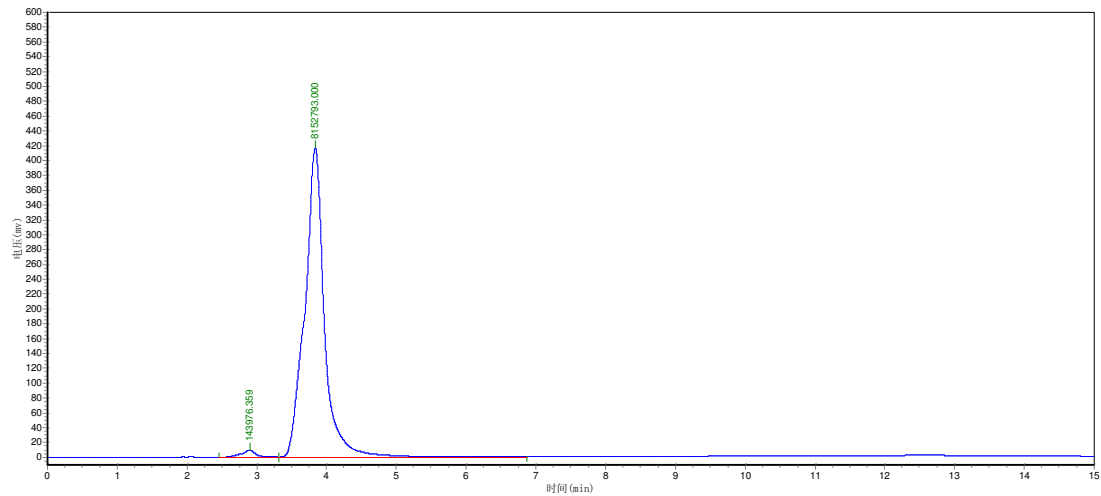

| Peak   | Ret. Time (min) | Height (mAu) | Area (Mau*s) | Area Percent (%) |
|--------|-----------------|--------------|--------------|------------------|
| 1      | 2.895           | 9926.755     | 143976.359   | 1.7353           |
| 2      | 3.838           | 417120.344   | 8152793.000  | 98.2647          |
| Totals |                 | 294626.981   | 8234641.879  | 100.0000         |

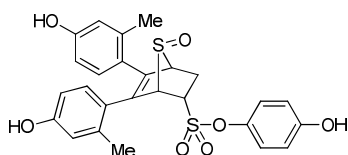

**11k**

Normal Phase (Method 50:50 EtOAc:Hex, Flow rate 0.7mL/min)

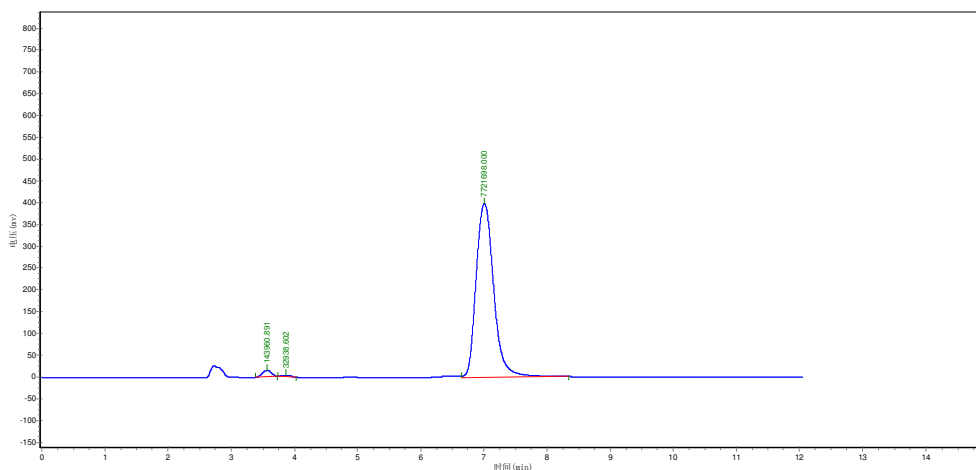

| Peak   | Ret. Time (min) | Height (mAu) | Area (Mau*s) | Area Percent (%) |
|--------|-----------------|--------------|--------------|------------------|
| 1      | 3.572           | 13999.131    | 143960.891   | 1.8226           |
| 2      | 3.862           | 3143.747     | 32938.602    | 0.4170           |
| 3      | 7.012           | 399141.750   | 7721698.000  | 97.7604          |
| Totals |                 | 416284.628   | 7898597.493  | 100.0000         |

Reverse Phase (Method 65:35 CH<sub>3</sub>CN:H<sub>2</sub>O, Flow rate 1.0mL/min)

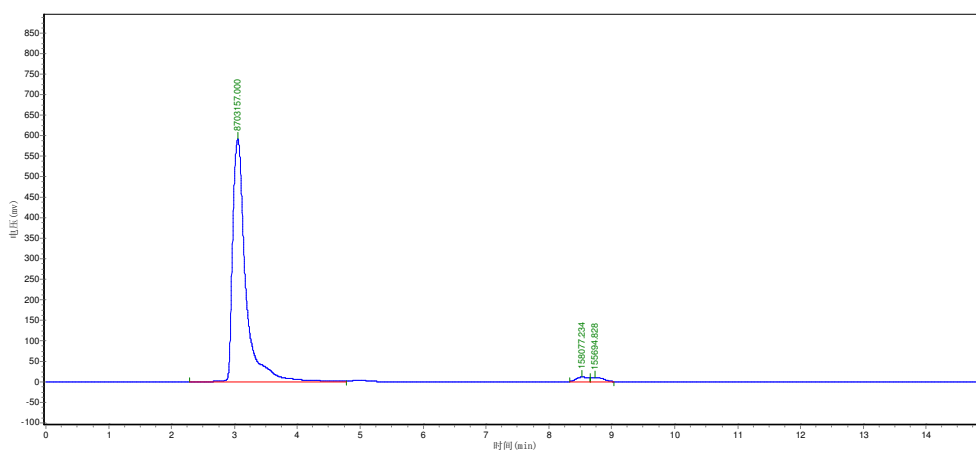

| Peak   | Ret. Time (min) | Height (mAu) | Area (Mau*s) | Area Percent (%) |
|--------|-----------------|--------------|--------------|------------------|
| 1      | 3.055           | 591818.125   | 8703157.000  | 96.5202          |
| 2      | 8.530           | 11524.939    | 158077.234   | 1.7531           |
| 3      | 8.738           | 10938.483    | 155694.828   | 1.7267           |
| Totals |                 | 614281.548   | 9016929.063  | 100.0000         |

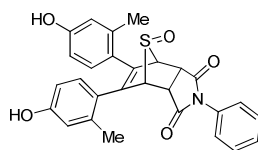

**111**

Normal Phase (Method 50:50 EtOAc:Hex, Flow rate 1.0mL/min)

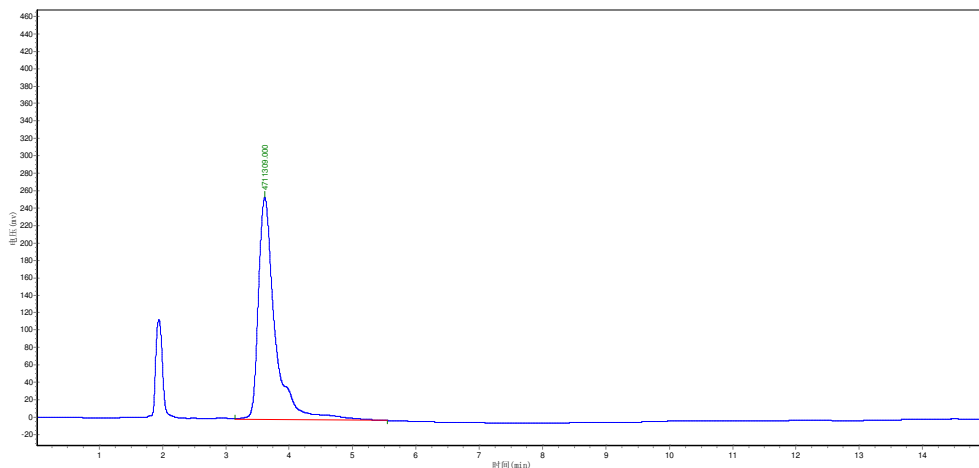

| Peak   | Ret. Time (min) | Height (mAu) | Area (Mau*s) | Area Percent (%) |
|--------|-----------------|--------------|--------------|------------------|
| 1      | 3.613           | 255048.875   | 4711309.000  | 100.0000         |
| Totals |                 | 255048.875   | 4711309.000  | 100.0000         |

Reverse Phase (Method 70:30 CH<sub>3</sub>CN:H<sub>2</sub>O, Flow rate 0.7mL/min)

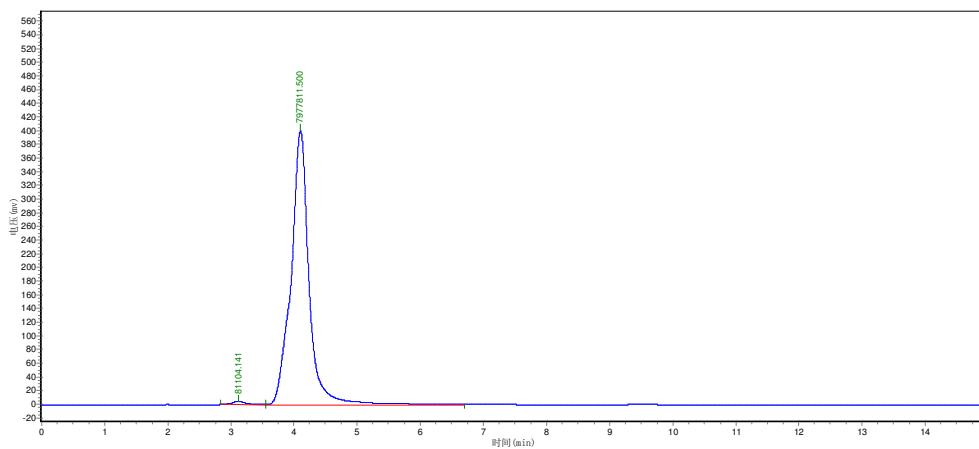

| Peak   | Ret. Time (min) | Height (mAu) | Area (Mau*s) | Area Percent (%) |
|--------|-----------------|--------------|--------------|------------------|
| 1      | 3.117           | 4689.180     | 81104.141    | 1.0064           |
| 2      | 4.102           | 400563.563   | 7977811.500  | 98.9936          |
| Totals |                 | 405252.742   | 8058915.641  | 100.0000         |

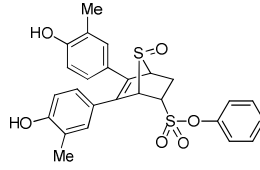

**12a**

Normal Phase (Method 50:50 EtOAc:Hex, Flow rate 0.7mL/min)

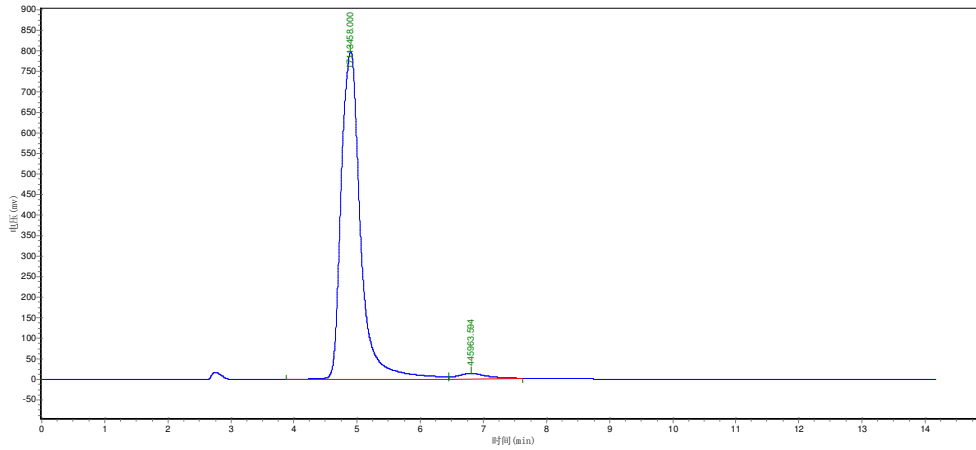

| Peak   | Ret. Time (min) | Height (mAu) | Area (Mau*s) | Area Percent (%) |
|--------|-----------------|--------------|--------------|------------------|
| 1      | 4.898           | 798737.875   | 17113458.000 | 97.4603          |
| 2      | 6.810           | 13776.256    | 445963.594   | 2.5397           |
| Totals |                 | 812514.131   | 17559421.594 | 100.0000         |

Reverse Phase (Method 70:30 CH<sub>3</sub>CN:H<sub>2</sub>O, Flow rate 0.7mL/min)

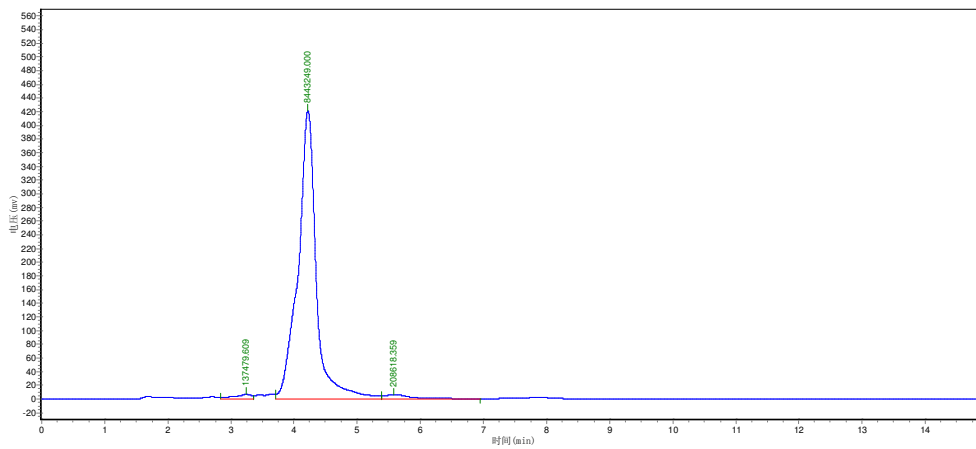

| Peak   | Ret. Time (min) | Height (mAu) | Area (Mau*s) | Area Percent (%) |
|--------|-----------------|--------------|--------------|------------------|
| 1      | 3.235           | 6891.063     | 137479.609   | 1.5642           |
| 2      | 4.220           | 421406.906   | 8443249.000  | 96.0623          |
| 3      | 5.577           | 5857.371     | 208618.359   | 2.3735           |
| Totals |                 | 434155.339   | 8789346.969  | 100.0000         |

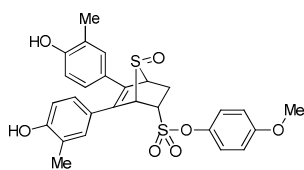

**12b**

Normal Phase (Method 40:60 EtOAc:Hex, Flow rate 1.0mL/min)

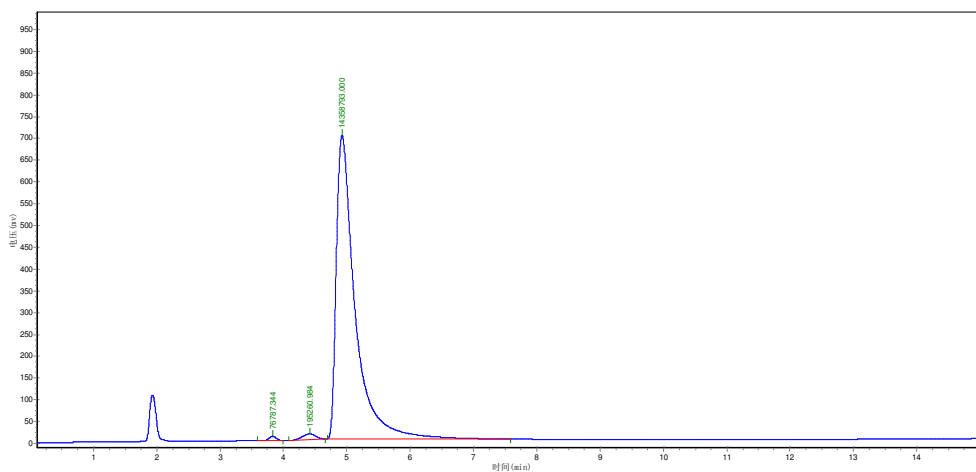

| Peak   | Ret. Time (min) | Height (mAu) | Area (Mau*s) | Area Percent (%) |
|--------|-----------------|--------------|--------------|------------------|
| 1      | 3.828           | 9588.650     | 76787.344    | 0.5248           |
| 2      | 4.415           | 13315.942    | 195260.984   | 1.3346           |
| 3      | 4.927           | 696633.438   | 14358793.000 | 98.1406          |
| Totals |                 | 719538.030   | 14630841.328 | 100.0000         |

Reverse Phase (Method 70:30 CH<sub>3</sub>CN:H<sub>2</sub>O, Flow rate 0.7mL/min)

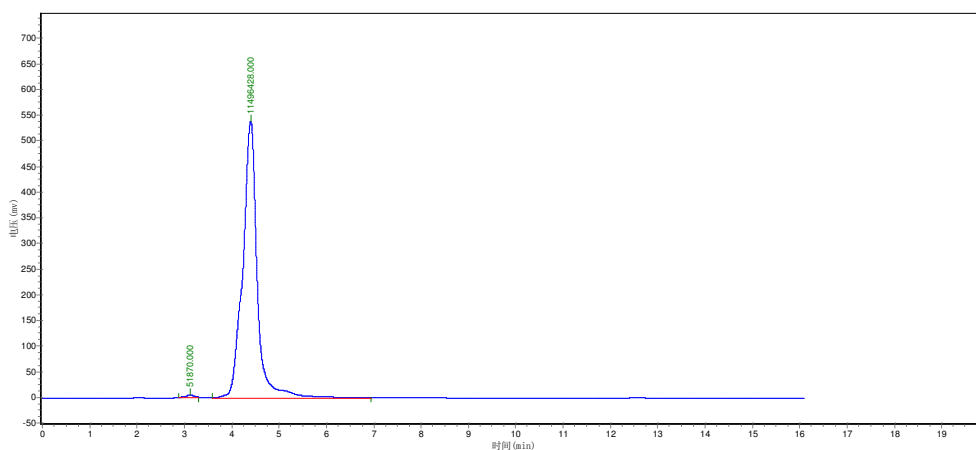

| Peak   | Ret. Time (min) | Height (mAu) | Area (Mau*s) | Area Percent (%) |
|--------|-----------------|--------------|--------------|------------------|
| 1      | 3.120           | 4602.833     | 51870.000    | 0.4492           |
| 2      | 4.398           | 538291.938   | 11496428.000 | 99.5508          |
| Totals |                 | 542894.771   | 11548296.000 | 100.0000         |

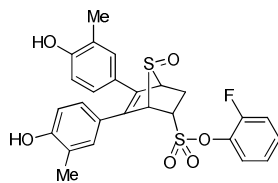

**12c**

Normal Phase (Method 50:50 EtOAc:Hex, Flow rate 0.7mL/min)

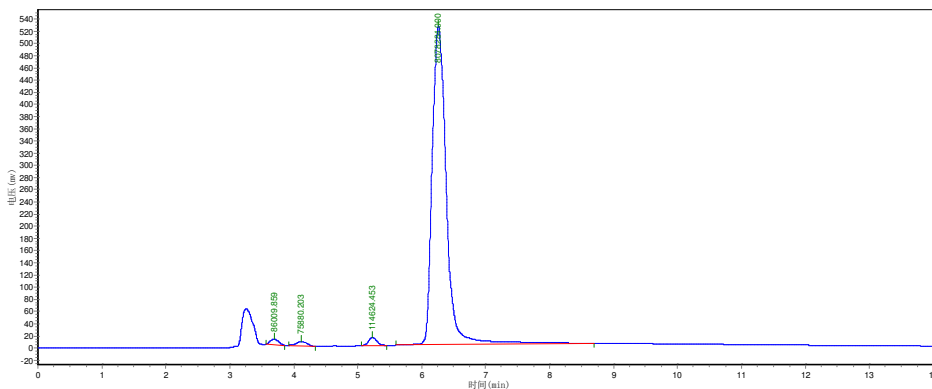

| Peak   | Ret. Time (min) | Height (mAu) | Area (Mau*s) | Area Percent (%) |
|--------|-----------------|--------------|--------------|------------------|
| 1      | 3.697           | 9460.989     | 86009.859    | 1.0295           |
| 2      | 4.117           | 6714.487     | 75880.203    | 0.9082           |
| 3      | 5.233           | 12825.291    | 114624.453   | 1.3720           |
| 4      | 6.262           | 523905.344   | 8078284.000  | 96.6904          |
| Totals |                 | 552906.111   | 8354798.516  | 100.0000         |

Reverse Phase (Method 65:35 CH<sub>3</sub>CN:H<sub>2</sub>O, Flow rate 1.0mL/min)

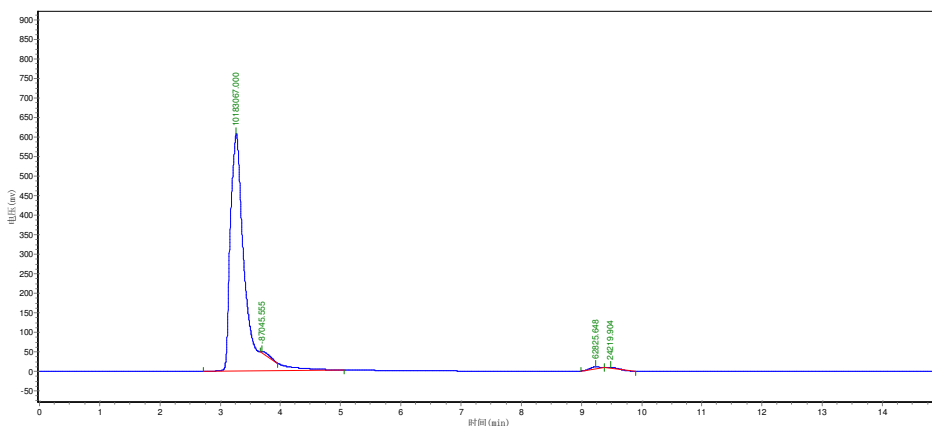

| Peak   | Ret. Time (min) | Height (mAu) | Area (Mau*s) | Area Percent (%) |
|--------|-----------------|--------------|--------------|------------------|
| 1      | 3.270           | 607873.125   | 10183067.000 | 98.2904          |
| 2      | 3.698           | 3729.721     | 87045.555    | 0.8548           |
| 3      | 9.242           | 5457.319     | 62825.648    | 0.6170           |
| 4      | 9.482           | 2474.740     | 24219.904    | 0.2378           |
| Totals |                 | 619354.906   | 10357158.108 | 100.0000         |

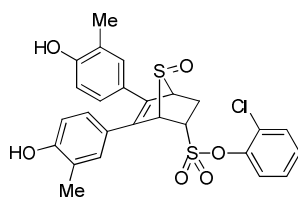

**12d**

Normal Phase (Method 50:50 EtOAc:Hex, Flow rate 0.7mL/min)

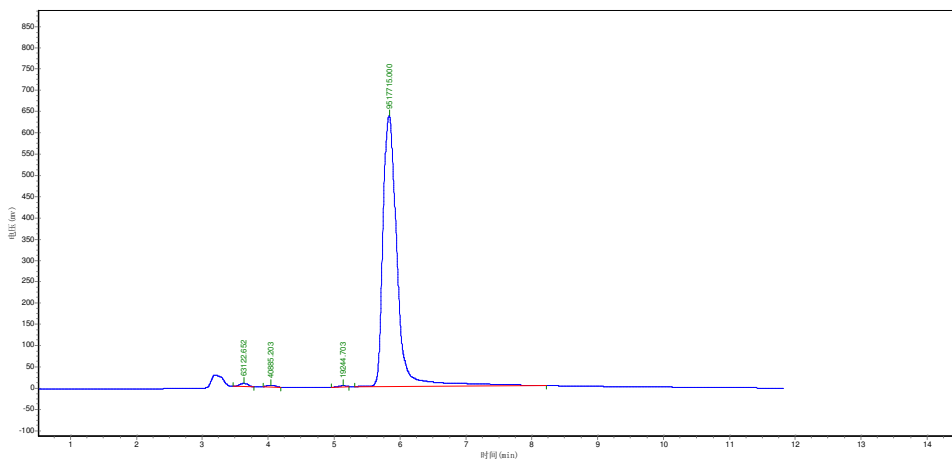

| Peak   | Ret. Time (min) | Height (mAu) | Area (Mau*s) | Area Percent (%) |
|--------|-----------------|--------------|--------------|------------------|
| 1      | 3.628           | 6923.989     | 63122.652    | 0.6547           |
| 2      | 4.037           | 4315.198     | 40885.203    | 0.4241           |
| 3      | 5.142           | 2632.998     | 19244.703    | 0.1996           |
| 4      | 5.837           | 636269.813   | 9517715.000  | 98.7216          |
| Totals |                 | 650141.998   | 9640967.558  | 100.0000         |

Reverse Phase (Method 70:30 CH<sub>3</sub>CN:H<sub>2</sub>O, Flow rate 0.7mL/min)

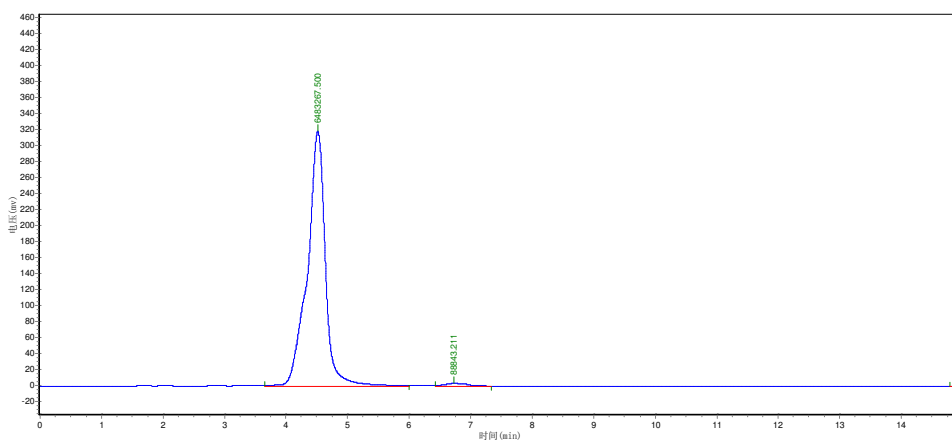

| Peak   | Ret. Time (min) | Height (mAu) | Area (Mau*s) | Area Percent (%) |
|--------|-----------------|--------------|--------------|------------------|
| 1      | 4.515           | 318515.125   | 6483267.500  | 98.6482          |
| 2      | 6.732           | 3481.786     | 88843.211    | 1.3518           |
| Totals |                 | 321996.911   | 6572110.711  | 100.0000         |

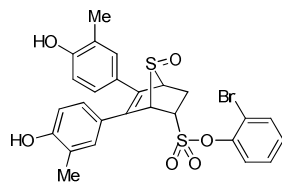

**12e**

Normal Phase (Method 50:50 EtOAc:Hex, Flow rate 0.7mL/min)

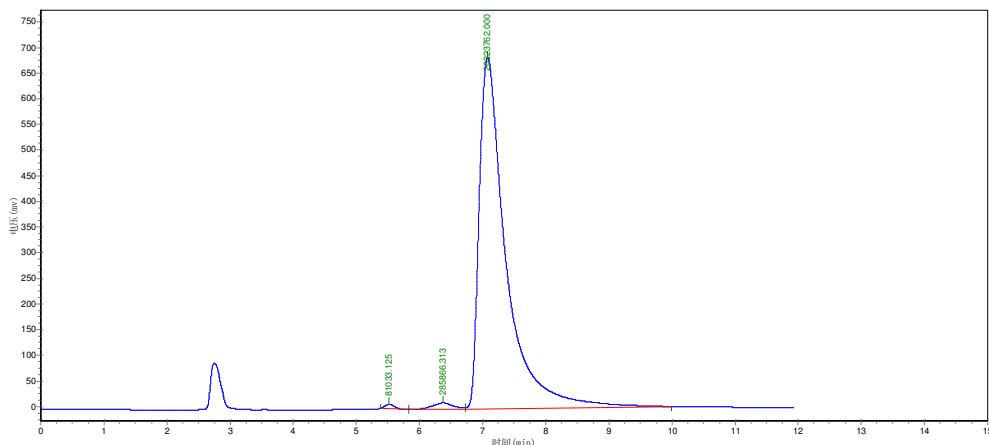

| Peak   | Ret. Time (min) | Height (mAu) | Area (Mau*s) | Area Percent (%) |
|--------|-----------------|--------------|--------------|------------------|
| 1      | 5.520           | 8123.751     | 81033.125    | 0.3935           |
| 2      | 6.375           | 12316.578    | 285866.313   | 1.3883           |
| 3      | 7.080           | 683750.938   | 20223762.000 | 98.2181          |
| Totals |                 | 704191.267   | 20590661.438 | 100.0000         |

Reverse Phase (Method 70:30 CH<sub>3</sub>CN:H<sub>2</sub>O, Flow rate 0.7mL/min)

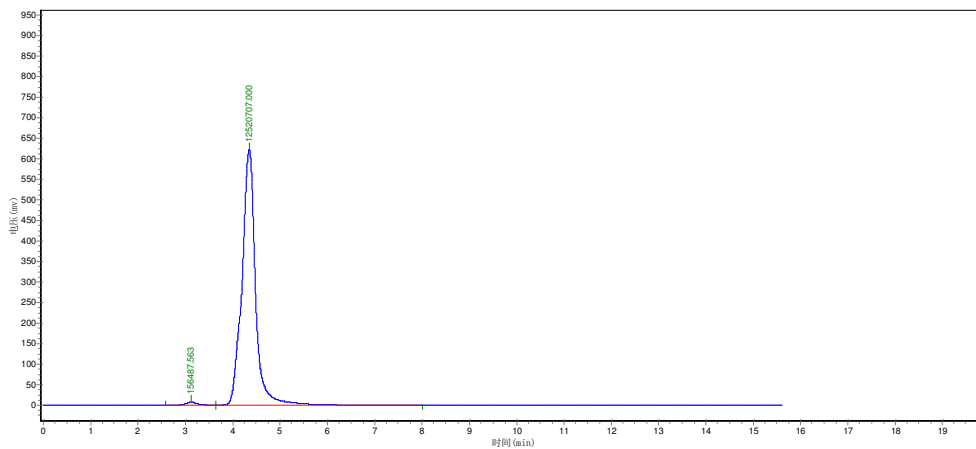

| Peak   | Ret. Time (min) | Height (mAu) | Area (Mau*s) | Area Percent (%) |
|--------|-----------------|--------------|--------------|------------------|
| 1      | 3.125           | 8604.837     | 156487.563   | 1.2344           |
| 2      | 4.352           | 623065.313   | 12520707.000 | 98.7656          |
| Totals |                 | 631670.149   | 12677194.563 | 100.0000         |



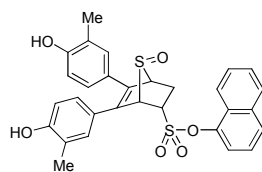

**12f**

Normal Phase (Method 50:50 EtOAc:Hex, Flow rate 0.7mL/min)

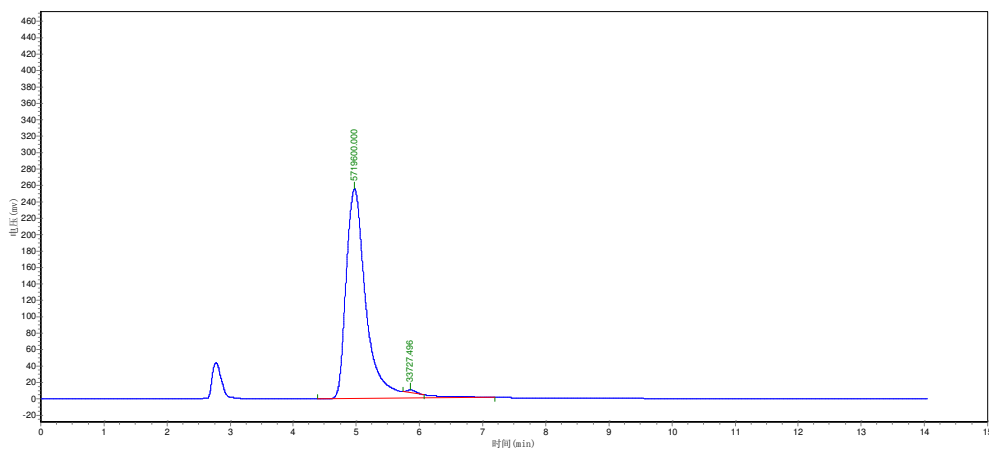

| Peak   | Ret. Time (min) | Height (mAu) | Area (Mau*s) | Area Percent (%) |
|--------|-----------------|--------------|--------------|------------------|
| 1      | 4.972           | 255511.906   | 5719600.000  | 99.4138          |
| 2      | 5.858           | 3350.983     | 33727.496    | 0.5862           |
| Totals |                 | 258862.889   | 5753327.496  | 100.0000         |

Reverse Phase (Method 70:30 CH<sub>3</sub>CN:H<sub>2</sub>O, Flow rate 0.7mL/min)

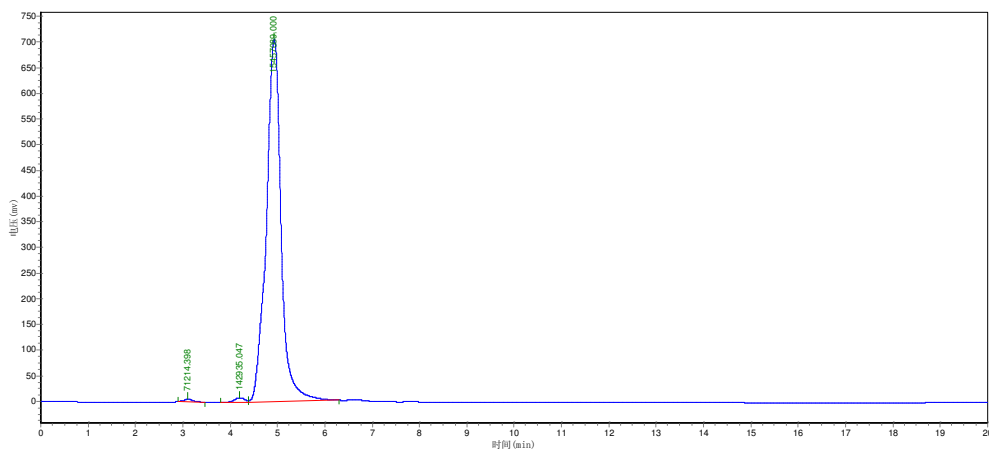

| Peak   | Ret. Time (min) | Height (mAu) | Area (Mau*s) | Area Percent (%) |
|--------|-----------------|--------------|--------------|------------------|
| 1      | 3.110           | 5670.439     | 71214.398    | 0.4544           |
| 2      | 4.205           | 8825.743     | 142935.047   | 0.9121           |
| 3      | 4.932           | 706738.875   | 15457089.000 | 98.6335          |
| Totals |                 | 721235.057   | 15671238.445 | 100.0000         |

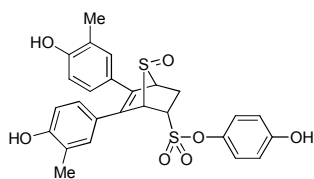

**12g**

Normal Phase (Method 50:50 EtOAc:Hex, Flow rate 0.7mL/min)

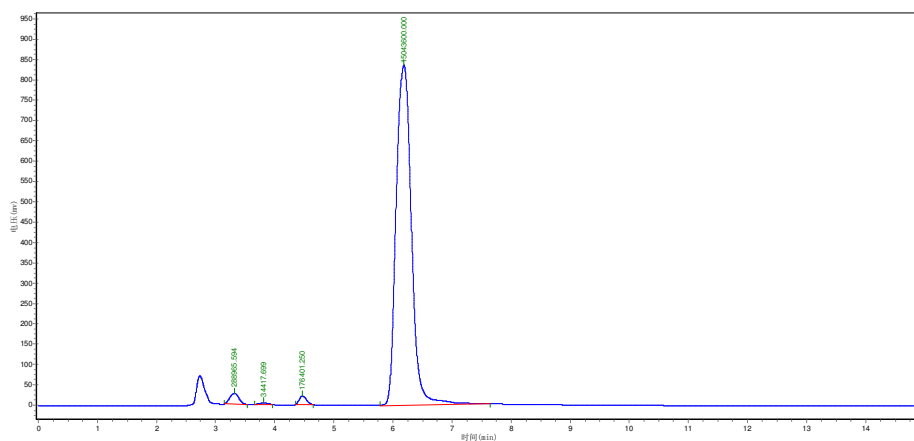

| Peak   | Ret. Time (min) | Height (mAu) | Area (Mau*s) | Area Percent (%) |
|--------|-----------------|--------------|--------------|------------------|
| 1      | 3.320           | 27025.043    | 288965.594   | 1.8591           |
| 2      | 3.813           | 3056.824     | 34417.699    | 0.2214           |
| 3      | 4.473           | 21144.994    | 176401.250   | 1.1349           |
| 4      | 6.187           | 837201.688   | 15043600.000 | 96.7846          |
| Totals |                 | 888428.549   | 15543384.543 | 100.0000         |

Reverse Phase (Method 60:40 CH<sub>3</sub>CN:H<sub>2</sub>O, Flow rate 1.0mL/min)

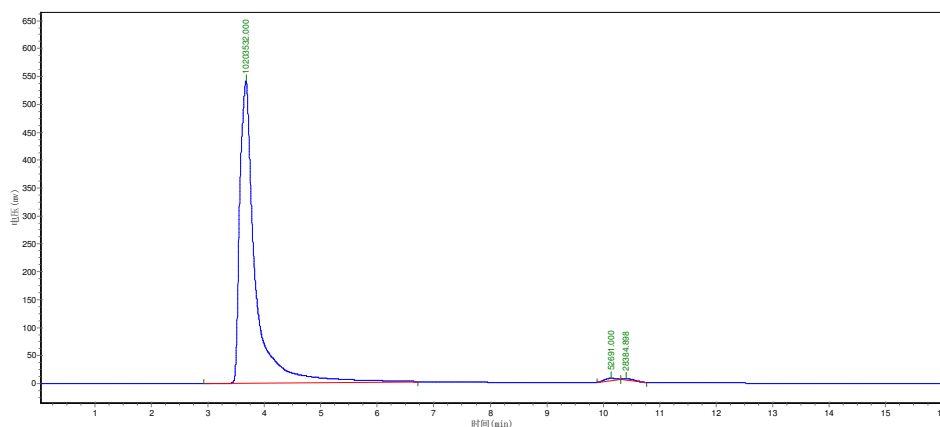

| Peak   | Ret. Time (min) | Height (mAu) | Area (Mau*s) | Area Percent (%) |
|--------|-----------------|--------------|--------------|------------------|
| 1      | 3.672           | 541909.625   | 10203532.000 | 99.2117          |
| 2      | 10.140          | 4117.536     | 52691.000    | 0.5123           |
| 3      | 10.412          | 1916.236     | 28384.898    | 0.2760           |
| Totals |                 | 547943.397   | 10284607.898 | 100.0000         |

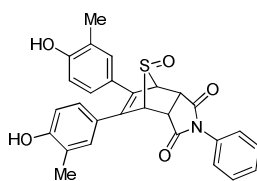

**12h**

Normal Phase (Method 50:50 EtOAc:Hex, Flow rate 1.0 mL/min)

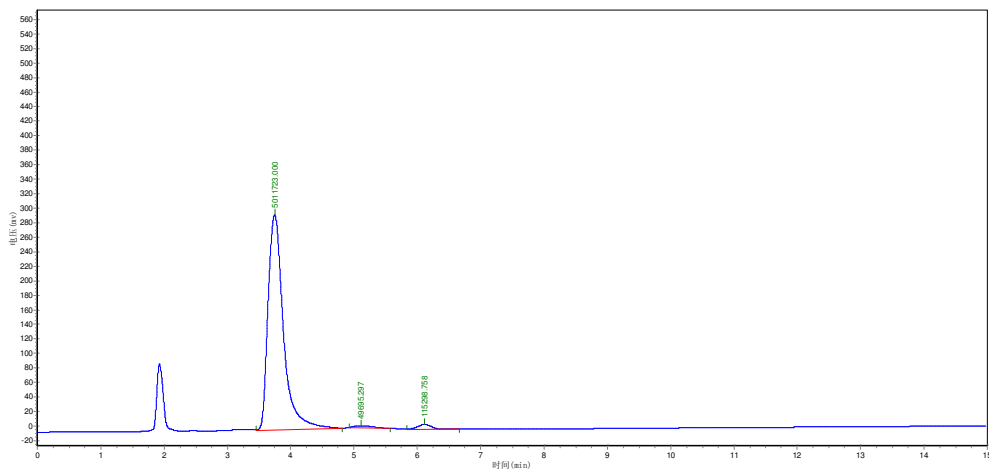

| Peak   | Ret. Time (min) | Height (mAu) | Area (Mau*s) | Area Percent (%) |
|--------|-----------------|--------------|--------------|------------------|
| 1      | 3.748           | 296715.875   | 5011723.000  | 96.8128          |
| 2      | 5.108           | 2479.886     | 49695.297    | 0.9600           |
| 3      | 6.117           | 6976.034     | 115298.758   | 2.2273           |
| Totals |                 | 306171.795   | 5176717.055  | 100.0000         |

Reverse Phase (Method 70:30 CH<sub>3</sub>CN:H<sub>2</sub>O, Flow rate 0.7 mL/min)

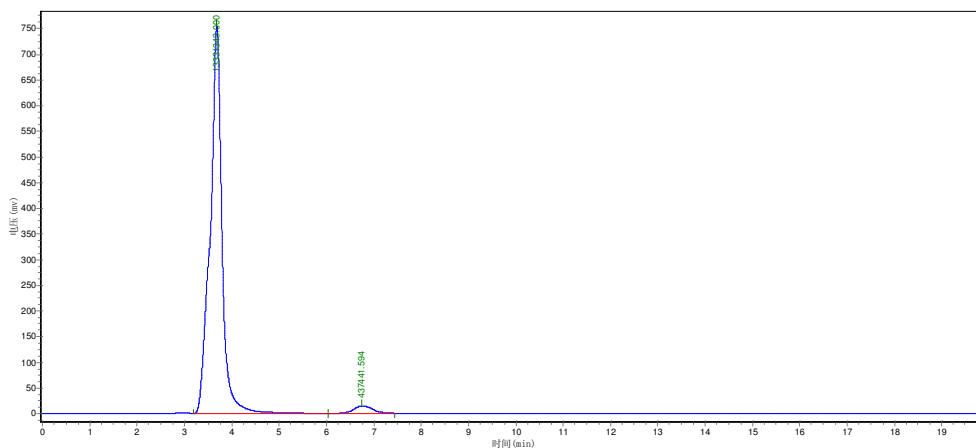

| Peak   | Ret. Time (min) | Height (mAu) | Area (Mau*s) | Area Percent (%) |
|--------|-----------------|--------------|--------------|------------------|
| 1      | 3.683           | 755397.813   | 13331343.000 | 96.8229          |
| 2      | 6.747           | 14299.833    | 437441.594   | 3.1771           |
| Totals |                 | 769697.646   | 13768784.594 | 100.0000         |

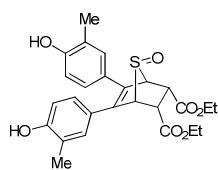

**12i**

Normal Phase (Method 50:50 EtOAc:Hex, Flow rate 0.7 mL/min)

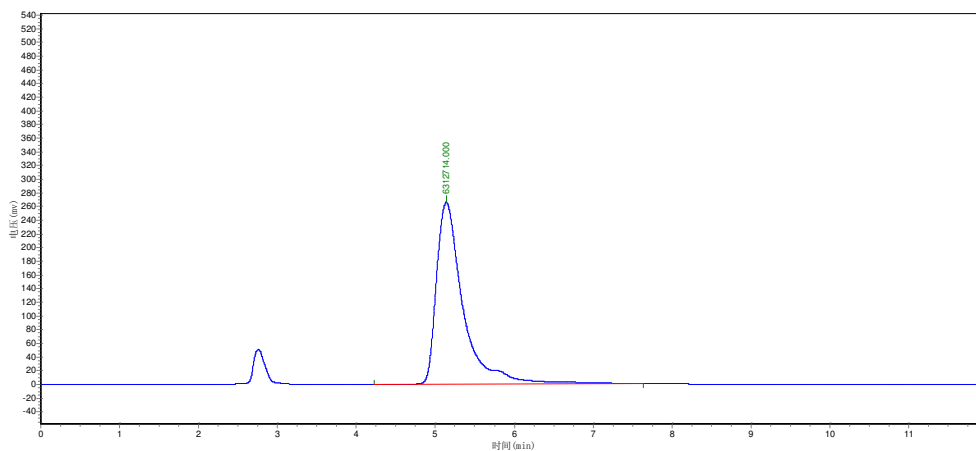

| Peak   | Ret. Time (min) | Height (mAu) | Area (Mau*s) | Area Percent (%) |
|--------|-----------------|--------------|--------------|------------------|
| 1      | 5.140           | 266199.063   | 6312714.000  | 100.0000         |
| Totals |                 | 266199.063   | 6312714.000  | 100.0000         |

Reverse Phase (Method 60:40 CH<sub>3</sub>CN:H<sub>2</sub>O, Flow rate 1.0 mL/min)

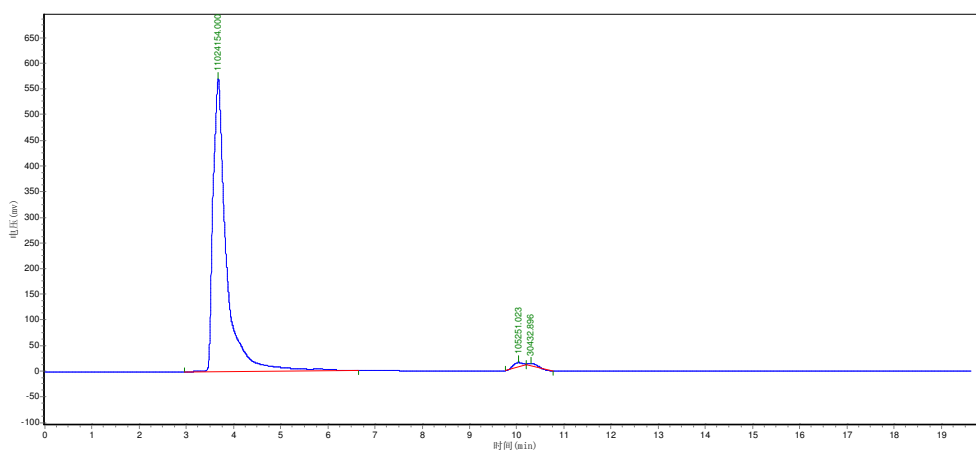

| Peak   | Ret. Time (min) | Height (mAu) | Area (Mau*s) | Area Percent (%) |
|--------|-----------------|--------------|--------------|------------------|
| 1      | 3.677           | 569771.688   | 11024154.000 | 98.7842          |
| 2      | 10.043          | 8281.521     | 105251.023   | 0.9431           |
| 3      | 10.312          | 3528.286     | 30432.896    | 0.2727           |
| Totals |                 | 581581.495   | 11159837.920 | 100.0000         |

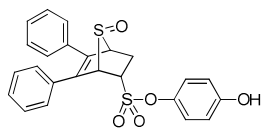

**13**

Normal Phase (Method 50:50 EtOAc:Hex, Flow rate 1.0 mL/min)

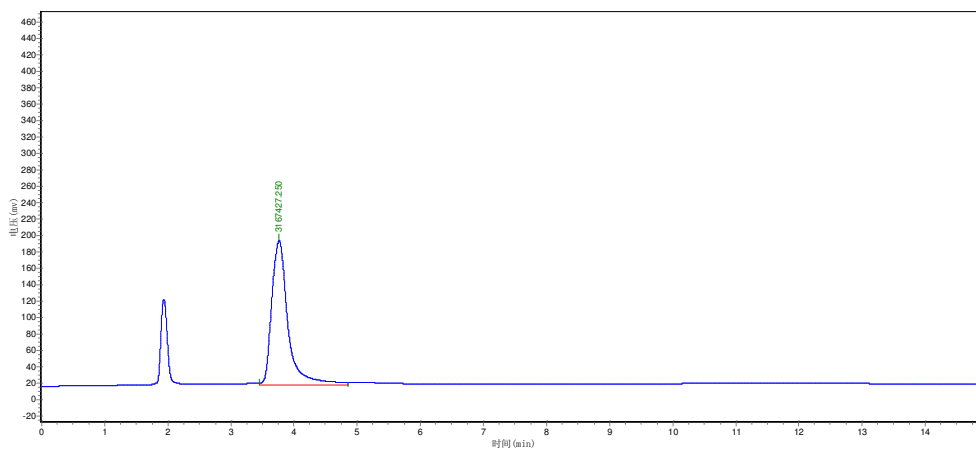

| Peak   | Ret. Time (min) | Height (mAu) | Area (Mau*s) | Area Percent (%) |
|--------|-----------------|--------------|--------------|------------------|
| 1      | 3.763           | 175996.281   | 3167427.250  | 100.0000         |
| Totals |                 | 175996.281   | 3167427.250  | 100.0000         |

Reverse Phase (Method 60:40 CH<sub>3</sub>CN:H<sub>2</sub>O, Flow rate 1.0 mL/min)

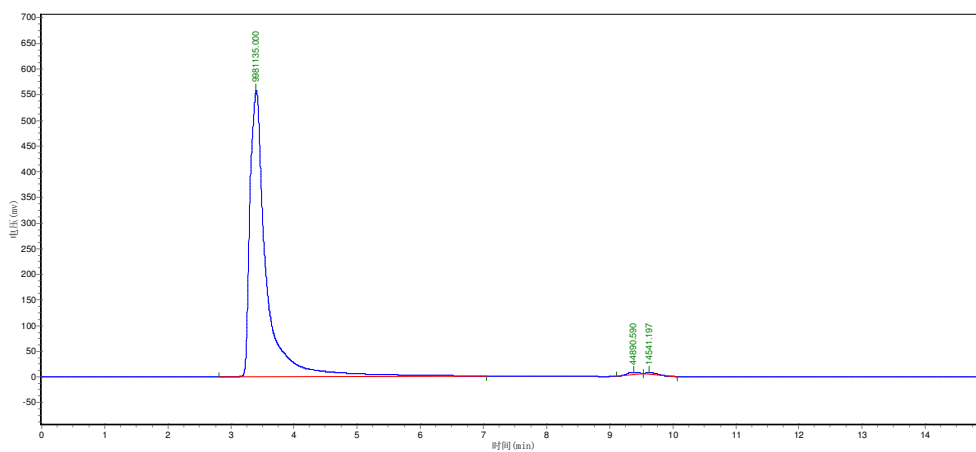

| Peak   | Ret. Time (min) | Height (mAu) | Area (Mau*s) | Area Percent (%) |
|--------|-----------------|--------------|--------------|------------------|
| 1      | 3.402           | 557744.313   | 9981135.000  | 99.4081          |
| 2      | 9.378           | 3853.167     | 44890.590    | 0.4471           |
| 3      | 9.633           | 1775.909     | 14541.197    | 0.1448           |
| Totals |                 | 563373.389   | 10040566.787 | 100.0000         |

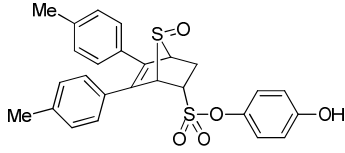

**14**

Normal Phase (Method 50:50 EtOAc:Hex, Flow rate 1.0 mL/min)

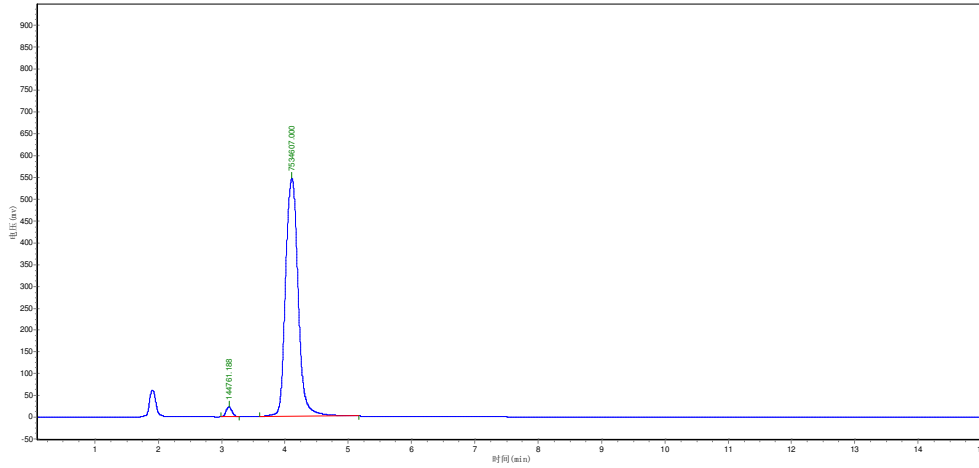

| Peak   | Ret. Time (min) | Height (mAu) | Area (Mau*s) | Area Percent (%) |
|--------|-----------------|--------------|--------------|------------------|
| 1      | 3.115           | 22387.133    | 144761.188   | 1.8851           |
| 2      | 4.112           | 545852.000   | 7534607.000  | 98.1149          |
| Totals |                 | 568239.133   | 7679368.188  | 100.0000         |

Reverse Phase (Method 60:40 CH<sub>3</sub>CN:H<sub>2</sub>O, Flow rate 1.0 mL/min)

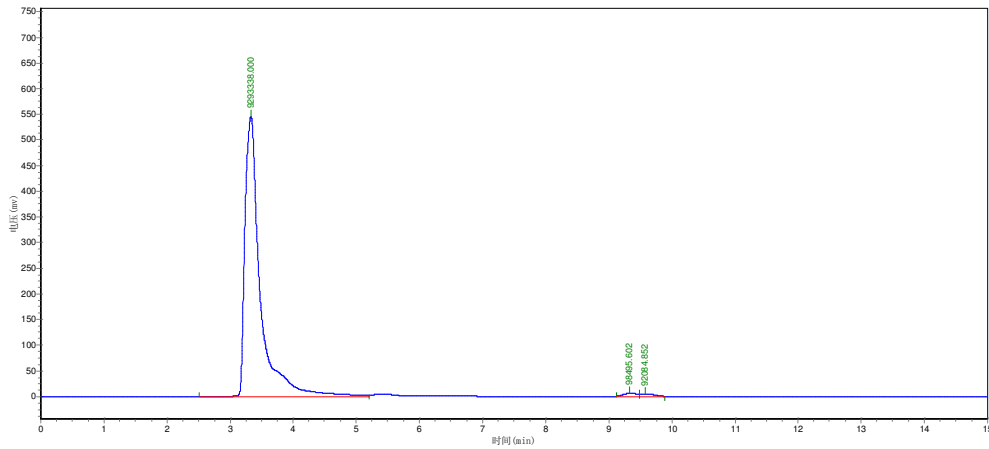

| Peak   | Ret. Time (min) | Height (mAu) | Area (Mau*s) | Area Percent (%) |
|--------|-----------------|--------------|--------------|------------------|
| 1      | 3.328           | 545421.375   | 9293338.000  | 97.9905          |
| 2      | 9.333           | 6518.988     | 98495.602    | 1.0386           |
| 3      | 9.580           | 5856.431     | 92084.852    | 0.9710           |
| Totals |                 | 557796.793   | 9483918.453  | 100.0000         |
